1  
2 **Hepatitis B vaccination as an elimination tool**  
3 **assessed in a paediatric cohort and simulated in a model**

4  
5 Anna L McNaughton<sup>1\*</sup>, José Lourenço<sup>2\*</sup>, Louise Hattingh<sup>3\*</sup>, Emily Adland<sup>4</sup>,  
6 Samantha Daniels<sup>3</sup>, Anriette Van Zyl<sup>3</sup>, Connie S Akiror<sup>5</sup>, Susan Wareing<sup>6</sup>,  
7 Katie Jeffery<sup>6</sup>, M Azim Ansari<sup>1</sup>, Paul Klenerman<sup>1,6</sup>, Philip J R Goulder<sup>4</sup>,  
8 Sunetra Gupta<sup>2</sup>, Pieter Jooste<sup>3</sup>, Philippa C Matthews<sup>1,6</sup>§

9  
10 \* These three authors contributed equally to the work presented here

11  
12 <sup>1</sup> Nuffield Department of Medicine, Peter Medawar Building for Pathogen Research, South  
13 Parks Road, Oxford OX1 3SY, UK

14 <sup>2</sup> Department of Zoology, Peter Medawar Building for Pathogen Research, South Parks Road,  
15 Oxford OX1 3SY, UK

16 <sup>3</sup> Department of Paediatrics, Kimberley Hospital, Kimberley, 8300, South Africa

17 <sup>4</sup> Department of Paediatrics, Peter Medawar Building for Pathogen Research, South Parks  
18 Road, Oxford OX1 3SY, UK

19 <sup>5</sup> Global Healthcare Public Foundation, Makindu Lane, Kololo, Kampala, Uganda

20 <sup>6</sup> Department of Infectious Diseases and Microbiology, Oxford University Hospitals NHS  
21 Foundation Trust, John Radcliffe Hospital, Headley Way, Oxford OX3 9DU, UK

22  
23 § Corresponding author email: [philippa.matthews@ndm.ox.ac.uk](mailto:philippa.matthews@ndm.ox.ac.uk)

24  
25  
26 **RUNNING HEAD:** HBV elimination in a clinical cohort and model

27  
28 **KEYWORDS:** hepatitis b virus; HBV; HIV; co-infection; epidemiology; Africa; South Africa;  
29 children; paediatrics; antibodies; vaccine; immunisation; elimination; transmission; dynamics;  
30 model; simulation; vertical transmission; PMTCT; number needed to vaccinate; sustainable  
31 development goals; public health

32  
33

34 **ABBREVIATIONS**

- 35 • 3TC - Lamivudine
- 36 • Anti-HBc – Antibody to hepatitis B core antigen (antibody mediated by exposure to
- 37 infection)
- 38 • Anti-HBe – Antibody to hepatitis B envelope antigen
- 39 • Anti-HBs – Antibody to hepatitis B surface antigen (vaccine-mediated antibody)
- 40 • ART – Anti-retroviral therapy
- 41 • COSAC – Coinfection in South African children
- 42 • EPI – Expanded Programme on Immunisation
- 43 • FTC - Entecavir
- 44 • HBV – Hepatitis B virus
- 45 • HBcAg – Hepatitis B core antigen
- 46 • HBeAg – Hepatitis B envelope antigen
- 47 • HBsAg – Hepatitis B surface antigen
- 48 • HBIg – Hepatitis B immunoglobulin
- 49 • HIV – Human immunodeficiency virus (type 1)
- 50 • KReC – Kimberley Respiratory Cohort
- 51 • PMTCT – Prevention of mother to child transmission
- 52 • RTHB – Road to Health Book
- 53 • TDF – Tenofovir
- 54 • UN – United Nations
- 55 • WHO – World Health Organisation

56

57

58 **ABSTRACT**

59 Sustainable Development Goals set a challenge for the elimination of hepatitis B virus (HBV)  
60 as a public health concern by 2030. We evaluate the current and future role of HBV vaccination  
61 and prevention of mother to child transmission (PMTCT) as tools for elimination, through the  
62 combined scrutiny of a paediatric cohort in South Africa and a model to simulate transmission  
63 and prevention. Existing efforts have been successful in reducing prevalence of infection  
64 (HBsAg) in children to <1%. Our model anticipates that current combination efforts of  
65 vaccination and PMTCT can significantly reduce population prevalence (HBsAg) by 2030, but  
66 will reduce the prevalence of HBV e-antigen positive carriers more slowly, with potential  
67 implications for public health control. With strategies and resources already available,  
68 significant, positive public health impact is possible, although time to HBV elimination as a  
69 public health concern is likely to be longer than that proposed by current goals.

70

## 71 INTRODUCTION

72 The vaccine against hepatitis B virus (HBV) infection is widely regarded as robust, safe and  
73 immunogenic (1–3). As such, it is one of the cornerstone strategies through which the  
74 international community can work towards the target set by United Nations Sustainable  
75 Development Goals (SDGs) for HBV elimination as a public health threat by the year 2030  
76 (4,5). In sub-Saharan Africa (sSA), a substantial burden of HBV transmission is likely to occur  
77 early in life, either vertically from mother to child, or through horizontal acquisition among  
78 young children (6). In this setting, the HBV vaccine has been progressively rolled out as part  
79 of the World Health Organisation (WHO) Expanded Programme on Immunisation (EPI) over  
80 the past two decades (6). In many countries, the first dose of vaccine is postponed until age  
81 six weeks, when it is given together with other routine immunizations; in South Africa, this is a  
82 hexavalent combination (HBV, Diphtheria, Tetanus, Pertussis, Haemophilus influenzae type  
83 B, Poliomyelitis) (7). Populations in sSA are particularly vulnerable to morbidity and mortality  
84 due to the high prevalence of HBV infection ( $\geq 8\%$  in many regions) (8–10), co-endemic HIV  
85 infection (11), poor access to screening and diagnostics, limited deployment of antiviral  
86 therapy, stigma of HBV infection, and chronic neglect of education, research and resources  
87 (12,13).

88

89 Vaccine deployment can be difficult to measure; many children in sSA are born outside  
90 healthcare settings, there are no robust data regarding coverage of the three dose regimen  
91 (6), and different immunological correlates of protection have been applied (14,15). In order  
92 to accelerate progress towards elimination goals, a variety of approaches has been  
93 suggested, including shifting the first dose to be given at birth (16), additional doses in the  
94 context of HIV infection (17,18), booster doses in individuals whose antibody titre fails to meet  
95 a target threshold (14), and catch-up vaccination campaigns for adolescents and adults.  
96 However, there is a lack of robust data to inform which of these measures, individually or in  
97 combination, is most effective in shifting populations towards sustained elimination of HBV  
98 infection as a public health concern. Given the resource limitations of many settings in which  
99 HBV represents a public health challenge, there is an urgent need to underpin interventions  
100 with an evidence base derived both from careful observation of the existing impact of  
101 vaccination and from projections regarding future outcomes on both the incidence and  
102 prevalence of HBV infection.

103

104 On these grounds, we have set out to collect a detailed dataset to provide a snapshot of a  
105 population in South Africa in which HBV and HIV infections are co-endemic, first seeking  
106 evidence of the impact of the current immunization schedule on preventing HBV infection  
107 (indicated by hepatitis B surface antigen, HBsAg) in children with and without HIV infection,

108 and to examine the potential waning of immunity over time (with protective immunity assessed  
109 by vaccine-mediated antibody titres, anti-HBs). We then assessed the extent to which  
110 continuation of current practice could be predicted to achieve elimination targets within the  
111 timeframe set out by SDGs. Finally, we built on this framework by adding data assimilated  
112 from reference to the wider published literature to model the effects of different HBV vaccine  
113 deployment strategies, either alone or in combination with enhanced measures for prevention  
114 of mother to child transmission (PMTCT). PMTCT depends on antenatal screening to identify  
115 HBV positive mothers, deployment of antiviral treatment during trimester three, accelerated  
116 neonatal vaccination, and ideally the administration of HBV immune globulin ('HBIG') to high-  
117 risk babies immediately after birth, although the latter is rarely affordable in resource-limited  
118 settings (19).

119  
120 The impact of HBV vaccination has been neglected in the modelling literature compared to  
121 other immunisations for infectious disease. To date, few studies have addressed this subject,  
122 with one study modelling the global prevalence of current intervention efforts (20), and another  
123 describing a modelling approach that scrutinizes the combined impact of broad HBV  
124 elimination strategies (21). Our study builds on these prior approaches in contributing to the  
125 development of robust insights into tackling the global burden of HBV. In this instance, we root  
126 our analysis within primary clinical data, single out the individual and combined impact of  
127 childhood vaccination and PMTCT strategies, and address the specific impact of co-endemic  
128 HIV infection. In so doing, we contribute to a growing body of evidence that can directly  
129 underpin practice in vaccination programmes, ensuring that clinical and public health  
130 resources are targeted in the best way to bring about HBV elimination, with particular  
131 reference to some of the world's most vulnerable settings that overlap with the epicentre of  
132 the HIV pandemic.

133  
134 Combining output from a clinical dataset together with a dynamic model provides a synergistic  
135 approach; in order to describe and understand the complete picture, both strands of evidence  
136 should be viewed together. Specifically, our paediatric cohort highlights the success and  
137 impact of the HBV vaccine programme in preventing new infections, while the model illustrates  
138 how simply continuing to pursue this strategy in isolation is not a reliable route to HBV  
139 elimination as a public health concern in the near future. Taking the evidence together, we  
140 conclude that while vaccination is a fundamental part of global elimination strategy and is  
141 highly effective in preventing infection in individual children, there is an urgent need for  
142 rigorous, enhanced deployment of parallel strategies including education, diagnostics, antiviral  
143 therapy, and the ongoing quest for a cure.

144

145 **RESULTS**

146 **Serological evidence of exposure to HBV infection**

147 From our cohort of 402 children in Kimberley, South Africa, three were HBsAg-positive (0.7%;  
 148 Table 1). This HBsAg prevalence is significantly lower than in adults in a comparable study  
 149 population (e.g. 11.1% in a previous study (9);  $p < 0.0001$ ). Exposure to HBV infection was  
 150 measured using anti-HBc antibody; this was detected in three children (0.7%), one of whom  
 151 was also HBsAg-positive. The other two were HBsAg negative, indicating previous HBV  
 152 exposure and clearance.

153

154 **Table 1: Profiles of five children from Kimberley, South Africa, with serological**  
 155 **evidence of current or previous infection with HBV (based on positive HBsAg (n=3) or**  
 156 **anti-HBc (n=2))**

| Subject                                  | K306                        | K405                        | KReC51           | KReC151                         | K093                        |
|------------------------------------------|-----------------------------|-----------------------------|------------------|---------------------------------|-----------------------------|
| <b>Cohort</b>                            | HIV positive age ≤60 months | HIV positive age ≤60 months | KReC             | KReC                            | HIV positive age >60 months |
| <b>Sex</b>                               | F                           | F                           | F                | M                               | F                           |
| <b>Age (months) at time of sampling</b>  | 18                          | 37                          | 20               | 15                              | 118                         |
| <b>HIV infection</b>                     | Positive                    | Positive                    | Negative         | Negative                        | Positive                    |
| <b>ART<sup>a</sup> (if HIV positive)</b> | Yes                         | Yes                         | NA               | NA                              | No                          |
| <b>Number of doses of HBV vaccine</b>    | NK                          | NK                          | NK               | 3                               | NK                          |
| <b>HBsAg result<sup>b</sup></b>          | <u>Detected</u>             | <u>Detected</u>             | <u>Detected</u>  | Not detected                    | Not detected                |
| <b>Anti-HBc result<sup>c</sup></b>       | Not detected                | Not detected                | <u>Detected</u>  | <u>Detected</u>                 | <u>Detected</u>             |
| <b>HBeAg result<sup>d</sup></b>          | Not done                    | Not done                    | <u>Detected</u>  | Not done                        | Not done                    |
| <b>Anti-HBs result<sup>e</sup></b>       | Not detected                | Not detected                | Not detected     | <u>Detected</u>                 | Not detected                |
| <b>Interpretation</b>                    | Active infection            | Active infection            | Active infection | Immunised, infected and cleared | Infected and cleared        |

157 <sup>a</sup>ART indicates the participant was receiving anti-retroviral therapy to treat HIV infection; <sup>b</sup>Hepatitis B surface  
 158 antigen test; <sup>c</sup>Hepatitis B core antibody test; <sup>d</sup>Hepatitis B envelope antigen test; <sup>e</sup>Hepatitis B surface antibody test  
 159 (vaccine mediated response). KReC = Kimberley Respiratory Cohort. NA = not applicable. NK=not known. HBV  
 160 viral loads were not tested in any of these children.

161

162 **Documented evidence of vaccination and serological evidence of immunity to HBV in**  
163 **children aged  $\leq 60$  months**

164 We collected written evidence of immunisation from the Road to Health Book (RTHB) in 90.8%  
165 HIV-negative (KReC) subjects and 6.3% of HIV positive subjects (total 41.3% of cohort). None  
166 of the HBsAg-positive children attended with a written vaccination record (RTHB). Due to  
167 missing vaccination records, in the absence of a detectable anti-HBs titre we cannot reliably  
168 distinguish between children who are unimmunized, and children who are immunised but fail  
169 to mount an antibody response. However, among those with a RTHB record, 81.3% of HIV-  
170 negative and 100% of HIV-positive children were recorded as having received three HBV  
171 vaccine doses.

172

173 Among all children age  $\leq 60$  months, 238/310 (77%) had an anti-HBs titre  $\geq 10$  mIU/ml  
174 suggesting some degree of vaccine-mediated immunity. The median anti-HBs titre in HIV-  
175 negative children was significantly higher than among the HIV-positive group (196 mIU/ml, vs.  
176 11 mIU/ml, respectively,  $p < 0.0001$ ) (Fig 1A). There was no detectable anti-HBs antibody in  
177 3.4% of HIV-negative vs. 47.8% of HIV-positive children ( $p < 0.0001$ ). Irrespective of the  
178 antibody titre used as a threshold for immunity, anti-HBs was higher in HIV-negative compared  
179 to HIV-positive children (Fig 1B). There was no significant difference in anti-HBs titres between  
180 male and female participants, either with or without HIV infection ( $p = 0.49$  and  $0.31$   
181 respectively, data not shown).

182

183 **Waning of vaccine response with age**

184 HIV-positive children with anti-HBs titres  $\geq 100$  mIU/ml were significantly younger than those  
185 with lower antibody titres (median age 17 months vs. 31 months,  $p = 0.0008$ ), while no such  
186 difference was observed within the HIV-negative group (Fig 2A). Using the lower threshold of  
187  $\geq 10$  mIU/ml, we found no significant difference by age in either the HIV-positive or the HIV-  
188 negative groups ( $p = 0.17$  and  $4.48$  respectively, data not shown). To expand our view of the  
189 HIV-positive group, we also added analysis of an older cohort (92 children aged  $> 60$  months),  
190 and demonstrated that anti-HBs titres were significantly lower in this older group ( $p < 0.0001$ ),  
191 with only 2/92 subjects (2.2%) achieving an anti-HBs titre of  $\geq 10$  mIU/ml (Fig 2B). Anti-HBs  
192 titres waned significantly with age up to age 60 months in HIV-positive children (Fig 2C;  
193  $p = 0.004$ ). We observed a similar trend in the HIV-negative cohort, but this did not reach  
194 statistical significance (Fig 2C;  $p = 0.07$ ). The proportion of HIV-positive subjects with a  
195 detectable anti-HBs titre declined steadily with age in the cohort, contrasting to the trend in  
196 HIV-negative subjects, where individuals maintained protective anti-HBs titres despite a trend  
197 towards decreasing mean titres (Fig 2C). Although the numbers of children in this cohort are  
198 small, and we did not collect longitudinal data, these results support previous literature reports

199 that HBV vaccine-mediated immunity wanes over time independently of HIV serostatus, but  
200 faster for HIV positive individuals (22,23).

201

### 202 **Stratification of vaccine responses by anti-retroviral therapy (ART) among HIV-positive** 203 **children**

204 For HIV-positive children aged  $\leq 60$  months, ART treatment data were available for 79% of  
205 subjects. Within this group, 71% were receiving ART at the time we tested for anti-HBs, and  
206 had received a median of 20 months of treatment (IQR 6-33 months). Comparing anti-HBs  
207 titres between ART-treated vs. untreated children, we found no significant difference ( $p=0.72$ ;  
208 76 ART-treated, median anti-HBs 13.3 mIU/ml and 31 untreated children, median anti-HBs  
209 14.1 mIU/ml, data not shown). There was also no difference between anti-HBs titres of children  
210 treated for  $\leq 12$  months vs.  $>12$  months ( $p=0.50$ , data not shown). We did not examine the  
211 effect of ART on anti-HBs titres in children  $>60$  months due to the low numbers of subjects  
212 with a detectable anti-HBs titre ( $n=2$ ).

213

### 214 **Odds of developing an anti-HBs response**

215 We used an odds ratio (OR) analysis to identify factors associated with vaccine-mediated  
216 protection (Fig 2D). HIV-positive status was associated with lack of protection, for antibody  
217 titres of both  $<10$  mIU/ml (OR 26.2, 95% CI 11.2-58.6), and  $<100$  mIU/ml (OR 11.6, 95% CI  
218 6.7-20.4). In contrast, younger age ( $<24$  months) was protective, (for anti-HBs  $<10$  mIU/ml OR  
219 0.3, 95% CI 0.2-0.5 and for anti-HBs  $<100$  mIU/ml OR 0.3, 95% CI 0.2-0.4). Other  
220 characteristics analysed including gender, ART, CD4+ count, CD4+ ratio and HIV viral load  
221 were not found to be significantly predictive of anti-HBs titres at either threshold.

222

### 223 **Fitting of a dynamic model to local HBV epidemiology**

224 We set out to use our clinical data to inform the development of a dynamic model to provide  
225 insights into the long-term outcomes of sustained immunization, and to suggest how  
226 prevention strategies can be optimized, for example by enhancement of PMTCT or extended  
227 vaccination campaigns targeting older age groups.

228

229 In summary, the model takes into consideration the susceptible proportion of the population  
230 (S), the chronic (C) and acute (I) carriers, the immune (R) and the vaccinated (V) (Fig 3A). To  
231 be able to parameterize HBV or vaccine-related epidemiological traits in age, such as age-  
232 specific probability of chronicity or decay of vaccine-induced protection, susceptible (S) and  
233 vaccinated (V) individuals are divided into three subgroups representing infants ( $i$ ,  $<1$  years of  
234 age), children ( $c$ , 1-6 years of age) and older individuals (comprising older children,  
235 adolescents and adults,  $a$ ,  $>6$  years of age). Chronic carriers, C, are divided into HBeAg-



236 positive (C+) and HBeAg-negative (C-) to further allow for different parameterization between  
237 these two biologically distinct states.

238

239 Informed by the cohort data described above, natural decay and the effects of HIV sero-status  
240 on vaccine-induced protection are also taken into account. We used a Bayesian Markov-chain  
241 Monte Carlo (bMCMC) approach to fit the dynamic model to the local demographic and  
242 epidemiological setting of Kimberley before projecting the impact of interventions. We used  
243 informative priors for model parameters for which robust literature support exists, and  
244 uninformative (uniform) priors otherwise. For full details on the model and fitting approach, see  
245 the Methods section.

246

247 The dynamic model was able to closely reproduce the target (fitted) variables – HBV  
248 prevalence (HBsAg), prevalence of HBV exposure (anti-HBc) (Fig 3 B1), and relative  
249 proportion of HBeAg-negative and HBeAg-positive among chronic carriers (Fig 3B2). For  
250 parameters for which little or no support was found in the literature (Fig 3C), the resulting  
251 posteriors were well behaved. For parameters using informative priors taken from the literature  
252 (Fig 3 D, E), the resulting posteriors matched well. Overall, the obtained bell-shaped posteriors  
253 highlighted no identifiability issues with the fitting approach (Fig 3 C, D, E).

254

255 The posterior for the rate of seroconversion from HBeAg-positive to HBeAg-negative ( $\theta$ )  
256 suggested slow progression, with a median period of ~18.5 years (95% CI [14.3, 21.9]). We  
257 note here that although we used an uninformative (uniform) prior for  $\theta$ , its posterior with  
258 median ~5.3% a year, here not accounting directly to age-specificity, is compatible with  
259 empirical estimations (24) of yearly rates of less than 2% for <3 years of age and 4-5% for  
260 older children (25), with ~90% of individuals acquiring HBV early in life remaining HBsAg-  
261 positive at the ages of 15-20 years (26). Spontaneous clearance of chronic HBV infection (loss  
262 of HBsAg) ( $\rho$ ) was estimated to be even slower, close to 0.3% a year (95% CI [0.04, 0.84]),  
263 slightly lower than reported rates of 0.7-2.26% previously observed in the literature (27–  
264 29), although there remains a lack of data for the African subcontinent.

265

### 266 **Model projection of the impact of routine neonatal vaccination and PMTCT alone**

267 Based on Sustainable Development Goals (SDGs) for the year 2030 set out in the WHO'S  
268 Global Health Sector Strategy on Viral Hepatitis (5), we have considered the impact of HBV  
269 interventions using two targets: (i) 90% reduction in HBsAg incidence (total new chronic HBV  
270 cases) relative to the pre-control era, and (ii) reduction of HBeAg-prevalence to 1 in 1000  
271 individuals in the population (0.1%) in the post-control era (see Materials and Methods for  
272 further details). In our projections of the impact of HBV interventions, we addressed the time

273 required to achieve these goals separately. Fig 4 shows the results of numerical simulations  
274 for varying coverage of neonatal vaccination and PMTCT. Variation presented is from the  
275 stochastic nature of the simulations, including demographic stochastically and parameter  
276 (posterior) sampling.

277

278 As expected, both HBsAg incidence (Fig 4 A1) and HBeAg-positive prevalence (Fig 4 B1)  
279 reduce faster with increasing neonatal immunization coverage, resulting in shorter times to  
280 reach the elimination targets (Fig 4 A2, B2). Importantly, even immunization of 100% of  
281 neonates is predicted to take ~99 years (95% CI 61 - 186) for the HBsAg incidence target to  
282 be achieved (Fig 4 A2), and ~175 years (95% CI 103 - 278) for the HBeAg-positive prevalence  
283 target (Fig 4 B2). Such long timeframes are supported by a previous modelling study (21).

284

285 When simulating PMTCT intervention, both HBsAg incidence (Fig 4 C1) and HBeAg-positive  
286 prevalence (Fig 4 D1) reduced faster in time for increasing efforts, resulting in shorter times to  
287 reach the elimination targets (Fig 4 C2, D2). However, the impact of PMTCT was smaller than  
288 neonatal vaccination for similar coverage, resulting in significantly longer times to reach the  
289 target thresholds. In fact, for the majority of PMTCT effort levels simulated, the targets could  
290 not be reached within 500 years (beige areas in Fig 4 C2, D2). For HBeAg-positive prevalence,  
291 only when PMTCT effort was 1 (i.e. complete elimination of vertical transmission), was the  
292 reduction target attainable within 500 years. These results reflect the impact of a control  
293 strategy that can be highly successful at preventing infections at a particular time-point in an  
294 individual's life (perinatally) but does not necessarily translate into sustained long-term  
295 protection.

296

297 The model suggests that reaching either of the elimination targets will require different  
298 intervention coverage and different time scales. In particular, the target for reducing HBsAg  
299 incidence is easier to achieve than reducing HBeAg-prevalence. This implies that for a certain  
300 vaccination coverage or PMTCT effort, reductions in HBsAg incidence must be interpreted  
301 with caution, as such positive trends will potentially mask the fact that HBeAg-positive  
302 prevalence, critical for public health, will not be responding at the same rate.

303

### 304 **Modelling progress towards HBV elimination by the year 2030 based on combinations** 305 **of neonatal vaccination and PMTCT**

306 Based on the premise that interventions in the South African population have been most  
307 consistently deployed since roll-out of the HBV vaccine in infancy since 1995 (6), we used our  
308 model to determine the impact of combined interventions by the year 2030 (Fig 5 A1, B1), and  
309 to predict the year at which the 90% reduction in HBsAg incidence and 0.1% HBeAg-positive

310 prevalence targets would be reached (Fig 5 A2, B2). Strikingly, HBsAg incidence could already  
311 have been reduced by >90% (Fig 5 A1) if both neonatal vaccination and PMTCT had been  
312 deployed at 100% coverage since they became widely available in 1995 (mean predicted year  
313 of elimination 2017; Fig 5 A2). In reality, complete coverage of such interventions is not  
314 possible, and we therefore projected outcomes based on <100% intervention coverage. For  
315 example, combining neonatal vaccination and PMTCT with 90% coverage of each since 1995  
316 is projected to achieve the HBsAg incidence target by 2028; if this is reduced to 80% coverage  
317 then goals will be attained by 2044. To achieve the target reduction in HBeAg-positive  
318 prevalence, the projected years are 2072 and 2096 (modelled on 90% coverage and 80%  
319 coverage of interventions, respectively, Fig 5 B1, B2). Again, these results suggest that setting  
320 goals based on HBsAg incidence obfuscates the difficulty of achieving targets based on  
321 HBeAg-positive prevalence on similar time scales.

322

### 323 **Projecting the probability of achieving elimination targets based on combinations of** 324 **neonatal vaccination, PMTCT and enhanced vaccination**

325 We simulated the impact of combining neonatal vaccination and PMTCT with additional  
326 vaccine deployment in other population groups (Fig 6 A1, A2), namely the routine vaccination  
327 of older children (at the entry point of 6 years of age), and one-off catch-up vaccination of  
328 children (<6 years) and others (>6 years).

329

330 Overall, the highest probability of achieving elimination targets is through a combination of  
331 100% neonatal vaccination coverage and PMTCT (Fig 6 A1, red line). Again, such high  
332 intervention efforts are realistically not attainable. We therefore also modelled an ambitious  
333 combination of 90% coverage of both neonatal vaccine and PMTCT (Fig 6 A1, A2, green line)  
334 as proposed in WHO'S Global Health Sector Strategy on Viral Hepatitis (5). Such intervention  
335 resulted in only 50% probability of reaching the HBsAg incidence target by 2030, and  
336 approaching 100% probability only by 2050. For the target based on HBeAg-positive  
337 prevalence, the probabilities of achieving the goal were pushed forward by approximately four  
338 decades.

339

340 Adding catch-up vaccination campaigns makes no impact on the probability of reaching either  
341 of the elimination targets (Fig 6 A1, A2, blue and cyan lines). Routine vaccination at 6 years  
342 of age as an alternative for PMTCT, even when delivered at 100% coverage, is markedly less  
343 effective than any other projected intervention (Fig 6 A1, A2, magenta line).

344

### 345 **Projecting the impact of HIV on the probability of achieving elimination targets**

346 As our clinical cohort is centred in South Africa, at the epicentre of the HIV pandemic, we also  
347 used our model to investigate the impact of co-endemic HIV on the success of interventions  
348 for HBV. We considered a baseline scenario defined by the epidemiological setting fitted by  
349 our model in the context of Kimberley, in which local HIV prevalence was taken into  
350 consideration for each of the modelled age groups (Fig 6 B1, B2, solid line). We then  
351 performed a sensitivity exercise, considering alternative scenarios in which HIV prevalence  
352 was altered to zero or higher prevalence, projecting HBV interventions into the future.

353

354 Overall, when compared to a scenario with no HIV (Fig 6 B1, B2, dotted line), the presence of  
355 HIV infection at the prevalence seen in Kimberley (Fig 6 B1, B2, solid line) has a relatively  
356 modest impact on the probability of achieving the HBV targets, adding an estimated four years  
357 to the time taken to achieve a 50% chance of reaching the goals (Fig 6 B1). We also simulated  
358 the effect of higher population HIV prevalence (x2, x3 and x4 baseline data for Kimberley) to  
359 investigate the potential impact of coinfection in high-risk populations. Increasing HIV  
360 prevalence, as expected, has a negative impact on the success of combined interventions for  
361 HBV, but the effects are relatively modest. In particular, doubling HIV prevalence would shift  
362 the 50% probability endpoint into the future by ~4 years for the HBsAg incidence target, and  
363 ~7 years for the HBeAg prevalence target. With increasing HIV prevalence, the negative  
364 impact on HBV interventions increases, particularly with respect to reduction in HBeAg  
365 prevalence. Encouragingly, as ART is now offered at the point of HIV diagnosis and uptake  
366 is consistently increasing, any detrimental impact of HIV coinfection is likely to diminish over  
367 time, with more of the HIV-infected population retaining near intact immunity.

368

## 369 **DISCUSSION**

370 This is a unique study in which we capitalize on detailed clinical cohort data collected in South  
371 Africa, represented here and also in our previous publications (9,30), in order to (i) form a  
372 robust view of the dynamics of HBV epidemiology, and (ii) develop a mathematical model of  
373 HBV transmission and prevention. Overall, we demonstrate that the optimum population  
374 intervention is high coverage neonatal vaccination, and that this can be strengthened by robust  
375 deployment of PMTCT. However, we project long time-scales to achieve elimination targets,  
376 congruent with the large established reservoir of chronic HBV infection, lack of curative  
377 therapy, infection that can persist for the entire life-span of the host, and interventions that  
378 target only a small proportion of the population. Developing an evidence-based understanding  
379 of the most effective approaches to control and elimination is key in light of the Sustainable  
380 Development Goals, and is a particular priority for resource-constrained settings that are often  
381 made particularly vulnerable by the high prevalence of both HIV and HBV infection. The

382 outputs from this model could be of direct influence in informing ongoing public health  
383 strategies in high-prevalence settings.

384

### 385 **Rationale for combining clinical data and modelling**

386 Importantly, by assimilating the results of the clinical cohort and the model, we develop a much  
387 more complete picture than either individual approach would provide in isolation. Standing  
388 alone, the clinical study could provide false reassurance that vaccination campaigns will be  
389 adequate to bring about control or elimination; conversely, in the absence of the cohort, the  
390 model could be mistakenly interpreted to suggest that vaccination offers limited benefits to  
391 population health in the short-medium term. Only by viewing the two conclusions together can  
392 we correctly infer that vaccination is of profound importance in protecting individual children  
393 and significantly reducing the burden of infection in paediatric cohorts, but also that continuing  
394 to pursue this strategy alone is not sufficient to bring about HBV elimination, or even robust  
395 control, within the desired time-scale. Although vaccination is a powerful strategy, it is not the  
396 short or medium term route to elimination of this pathogen.

397

### 398 **Comparison with other published models**

399 Compared to published models of other vaccine-preventable diseases (31), there is a marked  
400 deficit in the existing literature for HBV, with few other modelling efforts represented in the  
401 peer-reviewed literature (32,33). Reassuringly, our findings are consistent with those of  
402 another recent simulation of HBV prevention (21); we concur in concluding that current  
403 vaccine-based interventions will result in a modest reduction in HBV prevalence by the year  
404 2030. However, there are also some important differences that distinguish our work from  
405 previous efforts:

- 406 i. Our evaluation provides the advantages of both clinical data and a mathematical  
407 model, with close links between our cohort and simulations, and strengths in  
408 interpretation of data derived through different approaches. In so doing, we have also  
409 been able to specifically address the impact of co-endemic HIV that has not been  
410 factored into previous evaluations, using unique cohort data to implement a data-  
411 driven approach into the dynamic model.
- 412 ii. In contrast to approximating model behaviour to a wide range of epidemiological  
413 settings across many geographical regions, we focus on a particular population for  
414 which we derive unknown epidemiological parameters and apply a robust data-driven  
415 approach to others. Our Bayesian framework therefore stands alone (as a tool) that  
416 can be applied to any population for which empirical support of key HBV  
417 epidemiological parameters is missing. By supplying the model's code, we can  
418 facilitate the use of the tool by other academics.

419     iii.    As outputs, we have used targets for reductions in both HBsAg incidence and HBeAg-  
420            positive prevalence, and have projected the impact of interventions based specifically  
421            on the WHO proposal for 90% vaccination of neonates and 90% PMTCT coverage by  
422            2030. Previous studies (20,21) have focused instead on *ad hoc* control thresholds or  
423            impact on the public health problem through reduction of HBV-related deaths. By  
424            focusing on two alternative control targets for HBV, we conclude that different  
425            intervention efforts and time scales are required to achieve these. Goals based on  
426            HBeAg-positive prevalence levels are harder to achieve when compared to reductions  
427            in new infections, and reflect important epidemiological and public health traits of  
428            chronic infections; our results thus contribute to an ongoing discussion regarding which  
429            goals should be set, and their underlying public health implications.

430

### 431    **HBV model projections**

432    Although a high coverage of neonatal vaccination combined with robust PMCTC shows  
433    potential promise to reach elimination targets, the projected time-frame is currently  
434    substantially beyond the 2030 milestone. Furthermore, optimal intervention levels have not  
435    been in effect since 1995 and the real time-frame to achieve the goals is therefore expected  
436    to be considerably longer. We did not address elimination (extinction) in our projections, but it  
437    is clear from our main results that an elimination time-frame is far beyond reach with the  
438    interventions currently available, and efforts should, for now, be focused on planning for  
439    control of HBV as public health issue rather than elimination of the pathogen.

440

441    The model we have developed is statistically robust based on the parameters we have  
442    included for this population, and we believe this is an important parsimonious, data-driven tool,  
443    offering the potential to scrutinise different strategies independently from one another. The  
444    determinants of an equilibrium in any population depend on a number of factors, which may  
445    be determined by characteristics and behaviours of the host population (34) as well as  
446    potentially by the genetics of the virus. However, where the relevant epidemiological  
447    parameters have been defined, we believe the model could robustly be applied to other  
448    settings.

449

### 450    **Impact of HIV on population interventions for HBV**

451    Although previous studies in southern Africa have indicated that HBV infection is not  
452    significantly associated with HIV status (7,35,36), our data do highlight and corroborate a likely  
453    additional vulnerability of HIV-infected children based on lower anti-HBs titres and waning  
454    immunity over time. Impaired vaccine responses have previously been reported in HIV-  
455    positive individuals (18,37–40), but it is also possible that vaccine coverage is lower in HIV-

456 infected children (41). Waning of anti-HBs titres over time has been observed in both HIV-  
457 positive and HIV-negative subjects, but this does not necessarily correlate with loss of clinical  
458 protection; anamnestic responses are thought to occur in a proportion of those vaccinated  
459 (42), although this memory may be attenuated by HIV (43,44).

460

461 ART has previously been associated with improved HBV vaccine responses (45,46), although  
462 we did not replicate this finding in our cohort. This can potentially be explained by data from a  
463 previous study of Kimberley children, demonstrating that CD4+ T cell recovery takes a median  
464 of five years after ART initiation (47). Our current study is underpowered to detect any true  
465 effect, given both the relatively short durations of ART, and the small number of untreated  
466 children. Interestingly, despite the lack of direct association with ART, children with lower HIV  
467 viral loads had significantly higher anti-HBs titres, in keeping with previous studies (17,45).  
468 Based on current treatment guidelines, all HIV-infected children are now started on ART (48)  
469 and the immune reconstitution of this population over time is likely to reduce differences in  
470 vaccine responses between HIV-positive and HIV-negative groups.

471

#### 472 **Changes required to meet 2030 sustainable development goals**

473 The model suggests long time-lines, enumerated in centuries rather than decades, before  
474 control targets (focused on either HBsAg incidence or HBeAg prevalence) are reached using  
475 vaccination or PMTCT alone. Combinations of these interventions show much shorter time  
476 scales. Based on currently available interventions, major scaling up of both neonatal  
477 vaccination and PMTCT efforts will be required to deliver the 2030 targets. Importantly, the  
478 prevalence of HBeAg-positive carriers, who are at an elevated risk of chronic liver disease and  
479 hepatocellular carcinoma, as well as being at higher risk of transmitting their infection, will  
480 decline at a slower rate. Setting a control target based on reduction in the number of new HBV  
481 cases (i.e. HBsAg incidence) can therefore lead to the most optimistic projections but distract  
482 attention from the importance of reducing HBeAg-positive prevalence which constitutes the  
483 bulk of the public health burden of HBV.

484

485 Our results also underscore that a major public health impact is possible even without  
486 achieving elimination. Careful adjusting of expectations and aims, according to the scale on  
487 which particular changes occur, may inform the setting of realistic targets (e.g. reduction in  
488 the prevalence of HBeAg-positive carriers could be the most informative outcome measure).  
489 The wrong choice of either target or timescale could result in unnecessary abandonment of a  
490 strategy that could have a major impact in a few decades. In addition to informing rational use  
491 of interventions that have a positive population impact, our study is also important in cautioning  
492 against the use of strategies that may have little or no lasting population impact. This is

493 illustrated by our results for catch-up HBV vaccination, which adds little in situations where  
494 high coverage of both neonatal immunization and PMTCT can be attained. Considerable  
495 political drive, investing in increased surveillance and reducing barriers to treatment access  
496 will also be required in order to accurately monitor progress towards the elimination targets  
497 (49).

498

#### 499 **Impact of HIV and ART on achieving the 2030 sustainable development goals for HBV**

500 Our clinical cohort highlights the day-to-day challenges of drug provision and monitoring within  
501 this setting: we did not have access to detailed prospective ART treatment data, guidelines  
502 have changed numerous times since 2002, and 3TC was intermittently used as a substitute  
503 for nevirapine (NVP) due to supply issues. During the period covered by our study, ART was  
504 only introduced in children achieving certain immunological criteria (as per old treatment  
505 guidelines), while in future, infected children will be started on treatment as soon as diagnosed,  
506 which could restore vaccine responses to similar levels as seen in the HIV-negative  
507 population; further studies will be required to assess this over time. ART treatment is relevant  
508 to outcomes in individuals with HIV/HBV coinfection, as first line ART regimens include either  
509 lamivudine (3TC) or tenofovir (TDF), both of which have activity against HBV. Alternative  
510 approaches for HBV prevention in HIV-positive subjects, such as supplementing the current  
511 schedule with booster vaccinations and increased vaccine doses have been trialled with  
512 variable results (17). A promising recent study found that repeating the primary course of  
513 vaccination after establishing HIV-positive children on ART generated lasting protective  
514 immune responses (18).

515

516 We used cohort data to parameterize vaccine-induced protection depending on HIV  
517 serostatus and time since vaccination. As far as we know, this is the first data-driven approach  
518 to project the effects of HIV prevalence on HBV interventions using a dynamic model. Our  
519 projections propose that HIV does have a negative effect on HBV interventions, although HIV  
520 prevalence only marginally increases time to reach elimination targets, which may not be  
521 significant in light of the long overall time-frames that we project even in the absence of HIV.  
522 The high HIV prevalences modelled can occur in specific high-risk groups including sex  
523 workers and men who have sex with men (50) and it is likely that increased intervention will  
524 be required in these groups to minimise HBV transmission.

525

#### 526 **Caveats and limitations**

527 Different approaches to recruitment of our HIV-positive and HIV-negative cohorts may have  
528 introduced unintentional bias. By using respiratory admissions to hospital for the KReC cohort,  
529 we were able to identify and recruit a sufficient number of HIV-negative children, but the KReC



530 children may be less healthy than a comparable group of HIV-negative children in the  
531 community, and this approach predominantly selected younger children (on average 9.4  
532 months younger than the HIV-positive cohort).

533

534 We set out to focus on children aged <60 months in order to collect data from the RTHB. In  
535 practice, we did not capture good RTHB data and data collection from the RTHB is itself  
536 subject to bias, as families who attend with such records may be those who are most likely to  
537 have immunised their children. Numerous complex social factors are also relevant in  
538 determining whether children are immunised; babies born to mothers who have HIV and/or  
539 HBV are more likely to be disadvantaged by poverty, and by illness and death in the family,  
540 such that they might be less likely to present for (or respond to) vaccination. However, in this  
541 setting (and others where antenatal HBV screening is not routinely deployed (12,51,52)), we  
542 deem it unlikely that there is a significant difference in vaccination rates between infants born  
543 to HBV-positive versus HBV-negative mothers. Vaccine immunogenicity may be altered by a  
544 variety of other factors which we did not measure in this study, including maintenance of cold  
545 chain, body site of immunization, vaccine preparation (in this case the monovalent HBV  
546 vaccine (Biovac Paed)), circadian timing of vaccine doses, and time of day when samples are  
547 collected (53), although existing data for HBV vaccine do not support this (54).

548

549 We relied on HBsAg to detect cases of HBV infection. HBV DNA is a more sensitive screening  
550 tool but was not practical due to high cost and lack of availability in this setting. The relatively  
551 small numbers in each age group and the lack of longitudinal follow-up for individual children  
552 puts limitations on the data showing anti-HBs waning over time, but the trends we observe  
553 here are biologically plausible and consistent with the existing literature (23,55).

554

555 We have not considered the influence of population migration on the success of HBV  
556 interventions to reach the elimination targets. Migration of non-immune and/or infected  
557 individuals into an area would delay the time to achieve the targets estimated by our modelling  
558 approach. In the absence of clear data to underpin population migration in southern Africa, we  
559 have currently addressed our questions in the assumption that populations are static, but the  
560 potential impact on HBV control is an important consideration for regions in which there is  
561 significant population flux.

562

563 Although we have estimated and parameterized the impact of HIV status on HBV vaccine-  
564 induced protection, we have not modelled other factors related to HIV infection. Namely, we  
565 have not included the potential for increased susceptibility to HBV infection or increased risk  
566 of vertical transmission. These factors would have required further model classes and specific

567 parameterization, for which little literature support exists. It is likely that such HIV-related  
568 factors would have negative effects on our projections of impact, with time to reach elimination  
569 targets becoming longer. Including such factors is a possible path for future work once  
570 parametrization becomes possible from publically available data.

571

## 572 **Conclusions**

573 Our results affirm the success of the HBV vaccine programme in reducing the prevalence of  
574 HBV in children, with current prevalence rates of <1% underlining the importance of ongoing  
575 immunisation. However, we also highlight that cases of HBV transmission persist and that a  
576 proportion of children are potentially at risk of infection as a result of low anti-HBs titres, either  
577 as a result of missing or incomplete immunisation, or because of poor antibody titres following  
578 vaccination (especially in the context of HIV infection). We predict that current elimination  
579 targets, in particular when framed around reductions of HBeAg-positive prevalence, are  
580 unlikely to be achieved by 2030 based on existing interventions. Reaching the different  
581 proposed goals appears to be dependent upon different intervention efforts and thus can lead  
582 to very different levels of optimism and achievement, with important consequences on the  
583 future commitment of the players involved. For optimum impact, we suggest that elimination  
584 targets should be defined around HBeAg-positive carriers, which are a major proxy for the  
585 public health burden of HBV, and the target for which current interventions seem to have less  
586 impact. This highlights the essential need to collect better data that can help to inform progress  
587 towards targets, to optimize deployment of vaccination and PMTCT, and to invest substantially  
588 in education, case finding and treatment. The prospects of control would be substantially  
589 enhanced by improvements in therapy, and ultimately, the only route to elimination of HBV  
590 may be to develop a cure.

591

## 592 **MATERIALS AND METHODS**

### 593 **Ethics Approval**

594 Ethics approval for the study was obtained from the Ethics Committee of the Faculty of Health  
595 Science, University of the Free State, Bloemfontein, South Africa (HIV Study Ref: ETOVS Nr  
596 08/09 and COSAC Study Ref: ECUFS NR 80/2014). Written consent for enrolment into the  
597 study was obtained from the child's parent or guardian.

598

### 599 **Study cohorts**

600 Recruitment was undertaken in Kimberley, South Africa. A previous study of HBV serology in  
601 adults in the same setting found HBsAg prevalence of 9.5% (55/579) (7). Children were  
602 recruited as part of the Co-infection in South-African Children (COSAC) study as previously

603 described (30,56). The lower age limit of recruitment was 6 months in order to limit the  
604 detection of maternal anti-HBs.

605

606 Children were recruited as follows:

607 1. HIV-negative children age 6-60 months (n=174), recruited through the Kimberley  
608 Respiratory Cohort (KReC) as previously described (56). These children were admitted to  
609 hospital between July 2014 and August 2016 with a clinical diagnosis of respiratory tract  
610 infection. KReC children were confirmed HIV-negative in 163 cases (93.7%). A further 11  
611 children did not have an HIV test result recorded, but were assumed to be HIV-negative based  
612 on the clinical data recorded at the time of admission to hospital.

613 2. HIV-positive children were recruited primarily from HIV out-patient clinics between  
614 September 2009 and July 2016 as previously described (30,56). We recorded date of  
615 commencement of anti-retroviral therapy (ART), CD4+ T cell count and percentage, and HIV  
616 RNA viral load using the time point closest to the sample that was analysed for HBV serology.  
617 For the purpose of analysis, we divided these into two groups according by age:

618 i. Age 6-60 months; n=136. This group was selected to match the age range of  
619 the HIV-negative group, and also included five children who were initially  
620 screened for the KReC cohort but tested HIV-positive.

621 ii. Age >60 months (range 64-193 months); n=92.

622

623 Where possible, we recorded the number of HBV vaccine doses received based on the RTHB.  
624 At the time of undertaking this study, children were immunised with three doses of a  
625 monovalent HBV vaccine (Biovac Paed). The characteristics of the cohorts are summarised  
626 in table 2 and all metadata can be found in Suppl. data 1 on-line  
627 (<https://figshare.com/s/cd1e4f324606949d1680>).

628

629 **Table 2: Characteristics of three paediatric study cohorts, comprising 402 children,**  
630 **recruited from Kimberley Hospital, South Africa.**

| Cohort                        | HIV negative;<br>KReC<br>(age ≤60 months) | HIV positive<br>(age ≤60 months) | HIV positive<br>(age >60 months) |
|-------------------------------|-------------------------------------------|----------------------------------|----------------------------------|
| Number of subjects            | 174                                       | 136                              | 92                               |
| Age range in months           | 8-58                                      | 6-60                             | 64-193                           |
| Median age in<br>months (IQR) | 18 (12-26)                                | 29 (18-40)                       | 137 (122-154)                    |
| Sex (% male)                  | 55.4                                      | 44.9                             | 45.6                             |

631 KReC = Kimberley Respiratory Cohort. IQR = interquartile range.

632

### 633 **Laboratory assessment of HBV status**

634 Testing for Hepatitis B serum markers and DNA was performed as previously described; for  
635 HIV-positive children this is in keeping with recent implementation of HBV screening in  
636 Kimberley (30). Briefly, HBsAg testing was carried out in Kimberley Hospital, South Africa  
637 using the Magnetic parcel chemiluminometric immunoassay (MPCI; Advia Centaur platform).  
638 Confirmatory HBsAg testing was carried out by the UKAS accredited clinical microbiology  
639 laboratory at Oxford University Hospitals (OUH) NHS Foundation Trust, Oxford, UK (Architect  
640 i2000). For all samples, anti-HBs and anti-HBc testing were carried out by the OUH laboratory  
641 (Architect i2000). Limit of detection of the anti-HBs assay was 10 mIU/ml.

642

### 643 **Threshold for vaccine mediated immunity**

644 An absolute threshold for vaccine-mediated immunity is difficult to define, and studies variably  
645 quote anti-HBs titres of  $\geq 10$  mIU/ml or  $\geq 100$  mIU/ml as a correlate of protection. UK  
646 recommendations for testing HBV immunity often rely on the more stringent criterion of an  
647 anti-HBs titre of  $\geq 100$  mIU/ml (14). However, early vaccine studies have highlighted that a titre  
648 of  $\geq 10$  mIU/ml is likely to be a clinically relevant threshold for protection; a study of children in  
649 The Gambia showed that children who attained an anti-HBs titre of  $\geq 10$  mIU/ml were most  
650 likely to be immune (15), and another study demonstrated increased risk of infection when  
651 antibody titres fell  $< 10$  mIU/ml (57). Due to the varying use of different thresholds, we have  
652 presented our results pertaining to both thresholds of  $\geq 10$  mIU/ml and  $\geq 100$  mIU/ml.

653

### 654 **Statistical analysis**

655 Data from the cohort was analysed using GraphPad Prism v.7.0. We determined significant  
656 differences between sub-sets within the cohort using Mann-Whitney U tests for non-  
657 parametric data, Fisher's exact test for categorical variables and correlation between data  
658 points was assessed using Spearman's correlation coefficient.

659

### 660 **Mathematical model of HBV transmission and prevention**

661 A mathematical model was developed using ordinary differential equations (ODE) and is  
662 shown in Fig 3. Parameterization of transmission and prevention was based both on our  
663 Kimberley paediatric cohort and current literature estimates. Mid-year population estimates  
664 from 2016 published by Statistics South Africa (11) were used to underpin assumptions about  
665 life expectancy, fertility rate and infant mortality.

666

667 We used our mathematical model to simulate the transmission dynamics of HBV and the  
668 impact of interventions. Our approach is divided into three steps: fitting of demographic

669 background, fitting of HBV transmission background, and simulation of interventions. The  
 670 following set of ordinary differential equations (ODE) is used to model the deterministic  
 671 transmission of HBV under homogeneous mixing. Constant parameters informed by the  
 672 literature and estimated parameters are described in further detail below.

$$\frac{dS_i}{dt} = Z - cS_i - \lambda S_i - \mu S_i \quad (1)$$

$$\frac{dS_c}{dt} = (1 - \omega_c)cS_i - aS_c - \lambda S_c - \mu S_c \quad (2)$$

$$\frac{dS_a}{dt} = (1 - \omega_a)aS_c - \lambda S_a - \mu S_a \quad (3)$$

$$\begin{aligned} \frac{dI}{dt} = & \lambda\gamma S_a + \lambda\epsilon S_c + \lambda\psi S_i \\ & + \lambda\gamma(1 - \Delta_a)V_a + \lambda\epsilon(1 - \Delta_c)V_c + \lambda\psi(1 - \Delta_i)V_i \\ & - \sigma I - \mu I \end{aligned} \quad (4)$$

$$\frac{dR}{dt} = \sigma I + \rho C^- - \mu R \quad (5)$$

$$\frac{dC^-}{dt} = \theta C^+ - \rho C^- - \mu C^- \quad (6)$$

$$\begin{aligned} \frac{dC^+}{dt} = & W \\ & + \lambda(1 - \psi)S_i + \lambda(1 - \gamma)S_a + \lambda(1 - \epsilon)S_c \\ & + \lambda(1 - \psi)(1 - \Delta_i)V_i + \lambda(1 - \gamma)(1 - \Delta_a)V_a + \lambda(1 - \epsilon)(1 - \Delta_c)V_c \\ & - \theta C^+ - \mu' C^+ \end{aligned} \quad (7)$$

$$\frac{dV_i}{dt} = Z' - cV_i - \lambda(1 - \Delta_i)V_i - \mu V_i \quad (8)$$

$$\frac{dV_c}{dt} = cV_i + \omega_c cS_i - aV_c - \lambda(1 - \Delta_c)V_c - \mu V_c \quad (9)$$

$$\frac{dV_a}{dt} = aV_c + \omega_a aS_c - \lambda(1 - \Delta_a)V_a - \mu V_a \quad (10)$$

673  
 674 We take into consideration the susceptible proportion of the population ( $S_i$ ,  $S_c$ ,  $S_a$ , eq. 1-3),  
 675 the chronic ( $C^+$ ,  $C^-$ , eq. 6-7) and acute infections ( $I$ , eq. 4), the recovered and immune ( $R$ , eq.  
 676 5) and the vaccinated ( $V_i$ ,  $V_c$ ,  $V_a$ , eq. 8). Susceptible and vaccinated subgroups are divided  
 677 into 3 main classes representing infants ( $S_i$ , <1 years of age), children ( $S_c$ , 1-6 years of age)  
 678 and older individuals ( $S_a$ , >6 years of age).

679  
 680 **Carriage and infection types**

681 Carriers are represented by two chronic infection states depending on HBe-antigen status  
 682 (designated  $C^+$  for HBeAg-positive and  $C^-$  for HBeAg-negative), and  $I$  for acute infection.  
 683 Individuals may acquire HBV at any of the age classes, developing chronic infection  
 684 depending on age-associated risks:  $(1-\psi)$  for infants,  $(1-\epsilon)$  for children,  $(1-\gamma)$  for older ages.  
 685 We assume that the probability of developing chronic infections decreases with age, with  
 686  $\psi=0.15$ ,  $\epsilon=0.4$ , and  $\gamma=0.95$  (58–60). When developing chronic infection, we assume that all  
 687 individuals become HBeAg-positive but may lose this status and become HBeAg-negative at  
 688 a rate  $\theta$  (61). HBeAg-negative carriers may clear infection spontaneously at a rate  $\rho$ , entering  
 689 the recovered class ( $R$ ). Acute infections ( $I$ ) are assumed to last 6 months (62) and are cleared  
 690 at a rate  $\sigma$ , entering the recovered class ( $R$ ).

691

### 692 **Force of Infection**

693 All carriers contribute to the force of infection ( $\lambda$ , eq. 11). It is assumed that chronic HBe-  
694 antigen positive infections ( $C^+$ ) and acute infections ( $I$ ) have a higher transmission rate ( $\beta\beta_m$ )  
695 than chronic HBe-antigen negative infections ( $C^-$ ) ( $\beta$ ) (9):

$$\lambda = \beta[C^- + \beta_m(C^+ + I)] \quad (11)$$

696

### 697 **Births and Mortality**

698 The population is assumed to be of constant size with equal births  $b$  (eq. 12) and deaths ( $\mu$ ,  
699  $\mu'$ ). Due to HBV-associated mortality, the lifespan of chronic HBeAg-positive ( $C^+$ ) individuals  
700 is taken to be lower (50 years) than the general lifespan (59 years (11)). In the absence of  
701 control, the total number of births ( $b$ ) is divided into  $Z$  (eq. 13),  $W$  (eq. 14) and  $Z'$  (eq. 17)  
702 depending on the probability of vertical transmission ( $A_1, A_2$ ) and proportion vaccinated at birth  
703 ( $\omega_n$ ).  $W$  is the proportion of babies born to infected mothers acquiring infection at birth or  
704 shortly after, and  $Z$  the proportion born susceptible.

$$b = \frac{\mu(S_a + S_c + S_i + I + R + V_i + V_c + V_a + C^-) + \mu' C^+}{S_a + S_c + S_i + I + R + V_i + V_c + V_a + C^- + C^+} \quad (12)$$

$$Z = \frac{b(1 - \omega_n)(S_a + S_c + S_i + I + R + V_i + V_c + V_a) + bC^+(1 - \omega_n)(1 - A_1) + bC^-(1 - \omega_n)(1 - A_2)}{bC^+ A_1 + bC^- A_2} \quad (13)$$

$$W = bC^+ A_1 + bC^- A_2 \quad (14)$$

705

### 706 **Vertical Transmission**

707 Vertical transmission takes place from mothers with chronic infections and is dependent on  
708 their HBe-antigen serostatus, with frequency of transmission  $\alpha_1$  for HBeAg-positive ( $C^+$ ) and  
709  $\alpha_2$  for HBeAg<sup>-</sup> ( $C^-$ ). For interventions reducing vertical transmission,  $\alpha_1$  and  $\alpha_2$  are multiplied by  
710  $(1 - \zeta)$ , with  $\zeta \in [0, 1]$  being the impact of the intervention (eq. 15-16). For simplicity and lack of  
711 observations for appropriate parameterization, we assume that acute infections do not  
712 contribute to vertical transmission.

$$A_1 = \alpha_1(1 - \zeta) \quad (15)$$

$$A_2 = \alpha_2(1 - \zeta) \quad (16)$$

713

### 714 **Routine vaccination**

715 Routine vaccination is implemented under three general strategies: coverage of neonates ( $Z'$ ,  
716 eq. 8, 17), coverage of 1-6 years old by vaccinating individuals leaving the susceptible <1  
717 years old class (term  $c\omega_c S_i$  in eq. 9), and coverage of 6+ years old by vaccinating individuals  
718 leaving the susceptible 1-6 years old class (term  $a\omega_a S_c$  in eq. 10). In essence, we model  
719 vaccination occurring either at birth, or at particular ages (1 year, 6 years).

$$Z' = b\omega_n(S_a + S_c + S_i + I + R + V_i + V_c + V_a) + b\omega_n(1 - A_1)C^+ + b\omega_n(1 - A_2)C^- \quad (17)$$

720

### 721 **Catch-up vaccination**

722 For simplicity, catch-up is modelled in a single event (time step  $t_{cu}$ ), by moving a proportion of  
 723 susceptible individuals into the age-corresponding vaccinated classes. In practice, this is an  
 724 impulse event in the ODE system. Catch-up proportions are age-specific with parameters  $K_i$   
 725 for <1 years old,  $K_c$  for 1-6 years old, and  $K_a$  for 6+ years old.

$$K_i = \begin{cases} \kappa_i, & \text{if } t = t_{cu} \\ 0, & \text{otherwise} \end{cases} \quad (18)$$

$$K_c = \begin{cases} \kappa_c, & \text{if } t = t_{cu} \\ 0, & \text{otherwise} \end{cases} \quad (19)$$

$$K_a = \begin{cases} \kappa_a, & \text{if } t = t_{cu} \\ 0, & \text{otherwise} \end{cases} \quad (20)$$

726

### 727 **Markov-chain Monte-Carlo fitting approach**

728 In two independent steps, we fit certain ODE model outputs to empirically observed variables  
 729 in the South African population, to set demographic and transmission backgrounds before  
 730 simulating intervention strategies. We apply a Bayesian Markov-chain Monte-Carlo (MCMC)  
 731 approach, developed and used by us in other modelling studies (63,64). The proposal  
 732 distributions ( $q$ ) of each parameter are defined as Gaussian (symmetric), effectively  
 733 implementing a random walk Metropolis kernel. We define our acceptance probability  $\alpha$  of a  
 734 parameter set  $\Theta$  given model ODE output  $y$  as:

$$\alpha = \min\left\{1, \frac{\pi(y|\Theta^*)p(\Theta^*)q(\Theta^o|\Theta^*)}{\pi(y|\Theta^o)p(\Theta^o)q(\Theta^*|\Theta^o)}\right\} \quad (21)$$

735

736 where  $\Theta^*$  and  $\Theta^o$  are the proposed and current (accepted) parameter sets (respectively);  $\pi(y$   
 737  $| \Theta^*)$  and  $\pi(y | \Theta^o)$  are the likelihoods of the ODE output representing the (observed) variables  
 738 by each parameter set  $\Theta^*$  and  $\Theta^o$ ;  $p(\Theta^o)$  and  $p(\Theta^*)$  are the prior-related probabilities given  
 739 each parameter set.

740

741 For simplicity and because all fitted variables are proportions, the likelihoods  $\pi$  were calculated  
 742 as the product of conditional Gaussian probabilities ( $Pr\{\dots\}$ ). The likelihood is the product the  
 743 conditional probabilities of all variables. The likelihood can be formally expressed as:

$$\pi(y|\Theta) = \prod_{i=1}^N [Pr\{y_i = d_i\}] \quad (22)$$

744

745

## 746 **MCMC and model implementation**

747 The mathematical ODE model and MCMC approach were developed in C/C++ (available as  
748 additional material which will be uploaded on manuscript acceptance). Visualisations were  
749 implemented in R.

750

## 751 **Fitting demographic background**

752 Before considering transmission and interventions, we first fitted the model to a demographic  
753 background. This is done with the above described fitting approach without transmission (i.e.  
754 at  $t=0$ ,  $I+C^++C^- = 0$ ), using as target variables (Gaussian with standard deviation 1) the  
755 expected mean proportions of infants <1 years old ( $S_i=0.022$ ), children 1-6 years old ( $S_c=0.11$ )  
756 and older ages ( $S_a=0.868$ ) in the population of study (taken from Census 2011 (65)). We set  
757 the posteriors of the aging rates  $a$  and  $c$ , with median  $a=0.1337$  (95% CI 0.1330 - 0.1343) and  
758 median  $c=0.7536$  (95% CI 0.7369 - 0.7709). We set the values of  $a$  and  $c$  to the median values  
759 of the posteriors for all other model results (fitting transmission background and simulating  
760 interventions).

761

## 762 **Fitting transmission background**

763 After fitting demographic parameters and before considering interventions, we fitted the model  
764 to a transmission background. This is done using the above described fitting approach, with  
765 fixed aging rates  $a$  and  $c$ . The target variables are set to the percentage of the population that  
766 is HBsAg-positive (total carriers), percentage that are anti-HBc positive ( $R$ ), and relative  
767 prevalences of chronic carriers HBeAg-positive ( $C^+$ ) and HBeAg-negative ( $C^-$ ) for the  
768 population of study. We used target Gaussian distributions (standard deviation 1) with mean  
769 30% for anti-HBc, mean 8.3% for total carriers, mean proportion of 73% for HBeAg-negative  
770 and 23% for HBeAg-positive (9,66). In this step, the posteriors of the parameters  $\beta$ ,  $\rho$ ,  $\alpha_1$ ,  $\alpha_2$ ,  
771  $\theta$  and  $\beta_m$  are obtained.

772

## 773 **Fitted parameters and priors for transmission setting**

774 We fitted six parameters for the local transmission setting ( $\beta$ ,  $\rho$ ,  $\alpha_1$ ,  $\alpha_2$ ,  $\theta$  and  $\beta_m$ ). Gaussian  
775 informative priors are used for three parameters: frequency of vertical transmission  $\alpha_1$  for  
776 HBeAg-positive ( $C^+$ ) with mean  $M=0.8$  and standard deviation  $SD=0.05$ , the frequency of  
777 vertical transmission  $\alpha_2$  for HBeAg<sup>-</sup> ( $C^-$ ) with  $M=0.25$  and  $SD=0.05$  (59,60,67,68), and the  
778 increased transmission factor for chronic HBe-antigen positive infections ( $C^+$ ) and acute  
779 infections ( $I$ )  $\beta_m$  with  $M=10$  and  $SD=2.5$  (69–72). For  $\beta$ ,  $\rho$  and  $\theta$  uninformative, uniform priors  
780 are used with ranges of 0 to 30 for  $\beta$  and 0 to 1 for  $\theta$  and  $\rho$ . In the main results we demonstrate  
781 that the posteriors for  $\rho$  and  $\theta$  follow the scarce knowledge of these parameters.

782



### 783 **Simulating deterministic interventions**

784 After fitting demographics and transmission backgrounds, when simulating deterministic  
785 interventions, we fix  $a$ ,  $c$ ,  $\beta$ ,  $\rho$ ,  $\alpha_1$ ,  $\alpha_2$ ,  $\theta$  and  $\beta_m$  to the obtained posterior medians. We vary  
786 combinations of the intervention parameters  $\omega_n$ ,  $\omega_c$ ,  $\omega_a$ , (routine coverage for different ages),  
787  $K_i$ ,  $K_c$ ,  $K_a$  (catch-up coverages) and  $\zeta$  (reduction in vertical transmission). The transmission  
788 dynamics without interventions are run until the population reaches equilibrium, effectively  
789 reproducing the desired proportions as used in *Fitting transmission background*, at which point  
790 interventions are started and the model is tracked for 1000 years.

791

### 792 **Simulating stochastic interventions**

793 A stochastic version of the model presented in equations 1-10 was developed by introducing  
794 demographic stochasticity in state transitions. This followed a previously used strategy, in  
795 which multinomial distributions are used to sample the effective number of individuals  
796 transitioning between classes per time step (64,73,74). Multinomial distributions are  
797 generalized binomials – *Binomial* ( $n,p$ ) - where  $n$  equals the number of individuals in each  
798 class and  $p$  the probability of the transition event (equal to the deterministic transition rate).  
799 Simulations followed the same approach as described for deterministic simulations (see  
800 above). However, for each combination of parameters defining the intervention,  $N=50$   
801 stochastic simulations are run by sampling  $N$  times the posteriors of the parameters obtained  
802 in *Fitting transmission background* ( $\beta$ ,  $\rho$ ,  $\alpha_1$ ,  $\alpha_2$ ,  $\theta$  and  $\beta_m$ ). This approach effectively takes into  
803 account demographic stochasticity and parameter (posterior) variation.

804

### 805 **Measuring impact of interventions**

806 Sustainable development goals (SDGs) for the year 2030 have been set out in the WHO  
807 Global Health Sector Strategy on Viral Hepatitis (5). Given the public health relevance of  
808 chronic infections, in particular of HBeAg-positive infections, we here set out to measure  
809 impact of interventions based on two targets set for the year 2030:

- 810 i. The WHO target for a 90% reduction in HBsAg incidence, based on the assumption  
811 that this applies to chronic infection. (WHO goals also use reductions in HBsAg  
812 prevalence, and we have included this approach in Figure Supplements).
- 813 ii. An additional target for reduction of HBeAg-positive prevalence to 1 in 1000 (0.1%) in  
814 the whole population, relative to the pre-intervention era.

815

### 816 **Fitting of cohort data on HIV serostatus and HBV vaccine-induced protection**

817 We started with the assumptions that (i) protection is either constant or decays with age, (ii)  
818 vaccine efficacy reported elsewhere for infants is representative of protection levels in the

819 population cohort of 1 year olds (infants), and (iii) HIV status may alter protection levels and  
820 decay of vaccine-mediated protection over time (75).

821

822 First, using a response threshold of  $\geq 100$  mIU/ml as a correlate of protection (75), we  
823 calculated the percentage of protected individuals in age 1, 2, 3, 4 and 5 years old, as available  
824 in the cohort data. Following assumption (i), we normalized the percentage of protected  
825 individuals in age by the percentage found for 1 year olds. Following assumption (ii) we  
826 multiplied this scaled variable ( $[0,1]$ ) by an informed, literature-based baseline vaccine-  
827 induced protection (to infection) of 95% for HIV-negative infants and 75% for HIV-positive  
828 infants (see (75) for a recent literature review). The transformed protection cohort series are  
829 shown in red on Figure Supplement 1AB. The obtained efficacy in the age group of 1 year  
830 olds is seen to be  $\sim 95\%$  for HIV- and  $\sim 75\%$  for HIV+, as expected.

831

832 We then used nonlinear weighted least-squares to fit the transformed protection cohort series  
833 (Figure Supplement 1AB) and projected protection in ages, with weights equal to the inverse  
834 of the (empirical) standard error for each age class (Figure Supplement 1C). The nonlinear  
835 model ( $Y \sim a * X^b$ ) fitted the data closely (Figure Supplement 1AB) for both HIV-positive and  
836 HIV-negative individuals (with resulting coefficients  $a=0.7842$   $b=-1.0477$  for HIV-positive and  
837  $a=0.95246$   $b=-0.05265$  for HIV-negative). As reported elsewhere (75), projection of protection  
838 by age showed a significant difference depending on HIV serostatus, both in level of vaccine-  
839 mediated antibodies, and in decay of protection with age (Figure Supplement 1C).

840

#### 841 **Modelled HBV vaccine-induced protection in the context of HIV status**

842 Given that the age classes in the dynamic model are discrete ( $<1$ , 1-6, 6+ years of age) and  
843 for simplicity, we parameterized protection according to the predicted (Gaussian) distributions  
844 at the mean age of each age class in the model (Figure Supplement 1D). That is, we used the  
845 predicted mean (M) and standard deviation (SD) at ages 0.5, 3.5, 32.5 years as proxies for  
846 protection at model age classes  $<1$ , 1-6, 6+ years of age, respectively. The resulting  
847 distributions (shown in Figure Supplement 1D-F) were: HIV-negative aged  $<1y$  with  $M=0.952$   
848 and  $SD=0.024$ , aged 1-6y with  $M=0.892$  and  $SD=0.023$ , aged 6+y with  $M=0.796$  and  
849  $SD=0.074$ ; HIV-positive aged  $<1y$  with  $M=0.784$  and  $SD=0.148$ , aged 1-6y with  $M=0.217$  and  
850  $SD=0.070$ , aged 6+y with  $M=0.031$  and  $SD=0.039$ . These estimations were in accordance  
851 with previous studies and pooled ranges reported (75). Note that these values equate to  
852 protection at the individual level of each age class, such that, for example, HIV-negative aged  
853  $<1y$  with  $M=0.952$  equates to a mean of 95.2% vaccine-induced protection in that age class.

854

855 Vaccine-induced protection is modelled in the dynamic system using the term  $(1-\Delta x)$  in  
856 equations 4 and 7-10, where  $x$  relates to a specific age class. The term  $(1-\Delta x)$  therefore models  
857 a reduction in risk of infection, with  $\Delta x$  being the protection offered by the vaccine. Given that  
858 vaccine-induced protection is dependent on HIV status,  $\Delta x$  takes the following forms:

859

$$\Delta_i = P_i^+ \times v_i^+ + (1.0 - P_i^+) \times v_i^- \quad (25)$$

$$\Delta_c = P_c^+ \times v_c^+ + (1.0 - P_c^+) \times v_c^- \quad (26)$$

$$\Delta_a = P_a^+ \times v_a^+ + (1.0 - P_a^+) \times v_a^- \quad (27)$$

860

861 Where  $P_x^+$  is the HIV prevalence at a certain age  $x$ ,  $v_x^+$  the vaccine-induced protection at a  
862 certain age  $x$  for HIV-positive individuals, and  $v_x^-$  the vaccine-induced protection at a certain  
863 age  $x$  for HIV-negative individuals (as determined in the approach detailed above). HIV  
864 prevalence levels used in the context of Kimberley were 1% for <1 years of age, 5% for 1-6  
865 years of age, and 15% for >6 years of age (based on communications with clinicians in South  
866 Africa, (76)).

867

868 **REFERENCES**

869

- 870 1. Floreani A, Baldo V, Cristofolletti M, Renzulli G, Valeri A, Zanetti C, et al. Long-term  
871 persistence of anti-HBs after vaccination against HBV: An 18 year experience in  
872 health care workers. *Vaccine*. 2004;22:607–10.
- 873 2. Bialek SR, Bower W a, Novak R, Helgenberger L, Auerbach SB, Williams IT, et al.  
874 Persistence of protection against hepatitis B virus infection among adolescents  
875 vaccinated with recombinant hepatitis B vaccine beginning at birth: a 15-year follow-  
876 up study. *The Pediatric Infectious Disease Journal*. 2008;27(10):881–5.
- 877 3. Peto TJ, Mendy ME, Lowe Y, Webb EL, Whittle HC, Hall AJ. Efficacy and  
878 effectiveness of infant vaccination against chronic hepatitis B in the Gambia Hepatitis  
879 Intervention Study (1986–90) and in the nationwide immunisation program. *BMC*  
880 *Infectious Diseases*. 2014;14(7).
- 881 4. World Health Organization. Combating Hepatitis B and C to Reach Elimination by  
882 2030: Advocacy Brief. 2016.
- 883 5. World Health Organization. Global health sector strategy on viral hepatitis 2016-2021.  
884 2016;<http://www.who.int/hepatitis/strategy2016-2021/ghs>.
- 885 6. Burnett RJ, Kramvis A, Dochez C, Meheus A. An update after 16 years of hepatitis B  
886 vaccination in South Africa. *Vaccine*. 2012;30(Supplement 3):C45–51.
- 887 7. Chotun N, Nel E, Cotton MF, Preiser W, Andersson MI. Hepatitis B virus infection in  
888 HIV-exposed infants in the Western Cape, South Africa. *Vaccine*. 2015;33(36):4618–  
889 22.
- 890 8. Ott JJJ, Horn J, Krause G, Mikolajczyk RTT. Time trends of chronic HBV infection  
891 over prior decades – A global analysis. *Journal of Hepatology*. 2017;66(April  
892 2016):48–54.
- 893 9. Matthews PC, Beloukas A, Malik A, Carlson JM, Jooste P, Ogwu A, et al. Prevalence  
894 and characteristics of hepatitis B virus (HBV) coinfection among HIV-Positive women  
895 in South Africa and Botswana. *PLoS ONE*. 2015;10(7):e0134037.
- 896 10. Schweitzer A, Horn J, Mikolajczyk RT, Krause G, Ott JJ. Estimations of worldwide  
897 prevalence of chronic hepatitis B virus infection: A systematic review of data  
898 published between 1965 and 2013. *The Lancet*. 2015;386:1546–55.
- 899 11. Statistics South Africa. Mid-year population estimates.  
900 2016;<https://www.statssa.gov.za/publications/P0302/P030>.
- 901 12. O’Hara GA, McNaughton AL, Maponga T, Jooste P, Ocama P, Chilengi R, et al.  
902 Hepatitis B Virus as a Neglected Tropical Disease. *PLOS Neglected Tropical*  
903 *Diseases*. 2017;11(10):<https://doi.org/10.1371/journal.pntd.0005842>.
- 904 13. Mokaya J, McNaughton AL, Burbridge L, Maponga T, O’Hara G, Andersson M, et al.

- 905 A blind spot? Confronting the stigma of hepatitis B virus (HBV) infection - A  
906 systematic review. Wellcome Open Research. 2018;3(0):29.
- 907 14. Public Health England. Hepatitis B. In: Green Book: Immunisation against infectious  
908 disease. 2016. p. 161–85.
- 909 15. Jack A, Hall A, Maine N, Mendy M, Whittle H. What level of hepatitis B antibody is  
910 protective? The Journal of Infectious Diseases. 1999;179:489–92.
- 911 16. World Health Organization. Hepatitis B vaccines: WHO position paper, July 2017 –  
912 Recommendations. Vaccine. 2017;(July).
- 913 17. Catherine F-X, Piroth L. Hepatitis B virus vaccination in HIV-infected people: a review.  
914 Human Vaccines & Immunotherapeutics. 2017;DOI:  
915 10.1080/21645515.2016.1277844.
- 916 18. Lao-araya M, Puthanakit T, Aурpibul L, Taecharoenkul S, Sirisanthana T, Sirisanthana  
917 V. Prevalence of protective level of hepatitis B antibody 3 years after revaccination in  
918 HIV-infected children on antiretroviral therapy. Vaccine. 2011;29(23):3977–81.
- 919 19. Lee C, Gong Y, Brok J, Boxall EH, Gluud C, Eh B, et al. Hepatitis B immunisation for  
920 newborn infants of hepatitis B surface antigen-positive mothers (Review). Cochrane  
921 Database of Systematic Reviews. 2006;(2):DOI: 10.1002/14651858.CD004790.pub2.
- 922 20. Polaris T, Collaborators O. Global prevalence, treatment, and prevention of hepatitis  
923 B virus infection in 2016: a modelling study. The Lancet Gastroenterology &  
924 Hepatology. 2018;[http://dx.doi.org/10.1016/S2468-1253\(18\)30056-6](http://dx.doi.org/10.1016/S2468-1253(18)30056-6).
- 925 21. Nayagam S, Thursz M, Sicuri E, Conteh L, Wiktor S, Low-Beer D, et al. Requirements  
926 for global elimination of hepatitis B: a modelling study. The Lancet Infectious  
927 Diseases. 2016;16(12):1399–408.
- 928 22. Bui TTT, Tran TT, Nghiem MN, Rahman P, Tran TTT, Dinh MNH, et al. Molecular  
929 characterization of hepatitis B virus in Vietnam. BMC Infectious Diseases.  
930 2017;17(601):DOI 10.1186/s12879-017-2697-x.
- 931 23. Chaouch H, Hachfi W, Fodha I, Kallala O, Saadi S, Bousaadia A, et al. Impact and  
932 long-term protection of hepatitis B vaccination: 17 years after universal hepatitis B  
933 vaccination in Tunisia. Epidemiology and Infection. 2016;144(16):3365–75.
- 934 24. Liaw YF. HBeAg seroconversion as an important end point in the treatment of chronic  
935 hepatitis B. Hepatology International. 2009;3(3):425–33.
- 936 25. Chang M, Hsu H, Hsu H, Ni Y, Chen D. The Significance of Spontaneous Hepatitis B  
937 e Antigen Seroconversion in Childhood : With Special Emphasis on the Clearance of  
938 Hepatitis B e Antigen Before 3 Years of Age. Hepatology. 1995;5:1387–92.
- 939 26. Chu CM, Sheen IS, Lin SM, Liaw YF. Sex difference in chronic hepatitis B virus  
940 infection: studies of serum HBeAg and alanine aminotransferase levels in 10,431  
941 asymptomatic Chinese HBsAg carriers. Clinical infectious diseases. 1993;16(5):709–

- 942 13.
- 943 27. Ferreira SC, Chacha SG, Souza FF, Teixeira AC, Santana RC, Villanova MG, et al.  
944 Factors associated with spontaneous HBsAg clearance in chronic hepatitis B patients  
945 followed at a university hospital. *Ann Hepatol.* 2014;13(6):762–70.
- 946 28. Liu J, Yang HI, Lee MH, Lu SN, Jen CL, Wang LY, et al. Incidence and determinants  
947 of spontaneous hepatitis B surface antigen seroclearance: A community-based follow-  
948 up study. *Gastroenterology.* 2010;139(2):474–82.
- 949 29. Chu CM, Liaw YF. HBsAg seroclearance in asymptomatic carriers of high endemic  
950 areas: Appreciably high rates during a long-term follow-up. *Hepatology.*  
951 2007;45(5):1187–92.
- 952 30. Jooste P, van Zyl A, Adland E, Daniels S, Hattingh L, Brits A, et al. Screening,  
953 characterisation and prevention of Hepatitis B virus (HBV) co-infection in HIV-positive  
954 children in South Africa. *Journal of Clinical Virology.* 2016;85:71–4.
- 955 31. Hashim A, Dang V, Bolotin S, Crowcroft NS. How and why researchers use the  
956 number needed to vaccinate to inform decision making-A systematic review. *Vaccine.*  
957 2015;33(6):753–8.
- 958 32. Nayagam S, Conteh L, Sicuri E, Shimakawa Y, Suso P, Tamba S, et al. Cost-  
959 effectiveness of community-based screening and treatment for chronic hepatitis B in  
960 The Gambia: an economic modelling analysis. *The Lancet Global Health.*  
961 2016;4(8):e568–78.
- 962 33. Anderson S, Harper LM, Dionne-Odom J, Halle-Ekane G, Tita ATN. A decision  
963 analytic model for prevention of hepatitis B virus infection in Sub-Saharan Africa using  
964 birth-dose vaccination. *International Journal of Gynecology & Obstetrics.*  
965 2018;(January):1–7.
- 966 34. Medley GF, Lindop NA, Edmunds WJ, Nokes DJ. Hepatitis-B virus endemicity:  
967 heterogeneity, catastrophic dynamics and control. *Nature Medicine.* 2001;7(5):619–  
968 24.
- 969 35. Andersson MI, Maponga TG, Ijaz S, Barnes J, Theron GB, Meredith SA, et al. The  
970 epidemiology of hepatitis B virus infection in HIV-infected and HIV-uninfected  
971 pregnant women in the Western Cape, South Africa. *Vaccine.* 2013;31(47):5579–84.
- 972 36. Matthews PC, Geretti AM, Goulder PJR, Klenerman P. Epidemiology and impact of  
973 HIV coinfection with Hepatitis B and Hepatitis C viruses in Sub-Saharan Africa.  
974 *Journal of Clinical Virology.* 2014;61:20–33.
- 975 37. Sokal EM, Paganelli M, Wirth S, Socha P, Vajro P, Lacaille F, et al. Management of  
976 chronic hepatitis B in childhood: ESPGHAN clinical practice guidelines: Consensus of  
977 an expert panel on behalf of the European Society of Pediatric Gastroenterology,  
978 Hepatology and Nutrition. *Journal of Hepatology.* 2013;59(4):814–29.

- 979 38. Büchner A, Omar FE, Vermeulen J, Reynders DT. Investigating hepatitis B immunity  
980 in patients presenting to a Paediatric Haematology and oncology unit in South Africa.  
981 South African Medical Journal. 2014;104(9):628–31.
- 982 39. Mayaphi SH, Rossouw TM, Masemola DP, Olorunju S a S, Mphahlele MJ, Martin DJ.  
983 HBV/HIV co-infection : The dynamics of HBV in South African patients with AIDS.  
984 South African Medical Journal. 2012;102(3):157–62.
- 985 40. Beghin J-C, Ruelle J, Sokal E, Bachy A, Krishna M, Hall L, et al. Effectiveness of the  
986 South African Expanded Program of Immunization Against Hepatitis B in Children  
987 Infected With Human Immunodeficiency Virus-1 Living in a Resource-Limited Setting  
988 of Kwazulu-Natal. Journal of Medical Virology. 2017;89:182–5.
- 989 41. Ndirangu J, Barnighausen T, Tanser F, Tint K, Newell ML, Bärnighausen T, et al.  
990 Levels of childhood vaccination coverage and the impact of maternal HIV status on  
991 child vaccination status in rural KwaZulu-Natal, South Africa. Tropical Medicine and  
992 International Health. 2009;14(11):1383–93.
- 993 42. Banatvala J, Van Damme P, Oehen S. Lifelong protection against hepatitis B: The  
994 role of vaccine immunogenicity in immune memory. Vaccine. 2000;19(7–8):877–85.
- 995 43. Lao-araya M, Puthanakit T, Aурpibul L, Sirisanthana T, Sirisanthana V. Antibody  
996 response to hepatitis B re-vaccination in HIV-infected children with immune recovery  
997 on highly active antiretroviral therapy. Vaccine. 2007;25(29):5324–9.
- 998 44. Abzug MJ, Warshaw MG, Rosenblatt HM, Levin MJ, Nachman S, Pelton SI, et al.  
999 Immunogenicity and immunologic memory after hepatitis B virus booster vaccination  
1000 in HIV-infected children receiving highly active antiretroviral therapy. The Journal of  
1001 Infectious Diseases. 2009;200(6):935–46.
- 1002 45. Kim HN, Harrington RD, Van Rompaey SE, Kitahata MM. Independent clinical  
1003 predictors of impaired response to hepatitis B vaccination in HIV-infected persons.  
1004 International journal of STD & AIDS. 2008;19(9):600–4.
- 1005 46. Pippi F, Bracciale L, Stolzuoli L, Giaccherini R, Montomoli E, Gentile C, et al.  
1006 Serological response to hepatitis B virus vaccine in HIV-infected children in Tanzania.  
1007 HIV Medicine. 2008;9(7):519–25.
- 1008 47. Mori M, Adland E, Paioni P, Swordy A, Mori L, Laker L, et al. Sex Differences in  
1009 Antiretroviral Therapy Initiation in Pediatric HIV Infection. PloS one.  
1010 2015;10(7):e0131591.
- 1011 48. World Health Organization. Consolidated guidelines on the use of antiretroviral drugs  
1012 for treating and preventing HIV infection: recommendations for a public health  
1013 approach. World Health Organization.  
1014 2016;<http://apps.who.int/iris/bitstream/10665/208825/1/>.
- 1015 49. Lazarus J V, Safreed-harmon K, Colombo M, Reic T, Schatz E, Damme P Van. Many

- 1016 European countries “flying blind” in their efforts to eliminate viral hepatitis. *Nature*  
1017 *Reviews Gastroenterology & Hepatology*. 2017;14(8):445–6.
- 1018 50. South African National AIDS Council. *Let Our Actions Count: Reflections on NSP*  
1019 *2012-2016 and moving forward to NSP 2017-2022*. 2016.
- 1020 51. Chotun N, Preiser W, van Rensburg CJ, Fernandez P, Theron GB, Glebe D, et al.  
1021 Point-of-care screening for hepatitis B virus infection in pregnant women at an  
1022 antenatal clinic : A South African experience. *PLoS ONE*.  
1023 2017;12(7):doi.org/10.1371/journal.pone.0181267 Editor:
- 1024 52. Diale Q, Pattinson R, Chokoe R, Masenyetse L, Mayaphi S. Antenatal screening for  
1025 hepatitis B virus in HIV-infected and uninfected pregnant women in the Tshwane  
1026 district of South Africa. *South African Medical Journal*. 2015;106(1):97–100.
- 1027 53. Kurupati RK, Kossenkoff A, Kannan S, Haut LH, Doyle S, Yin X, et al. The effect of  
1028 timing of influenza vaccination and sample collection on antibody titers and responses  
1029 in the aged. *Vaccine*. 2017;35(30):3700–8.
- 1030 54. Karabay O, Temel A, Koker AG, Tokel M, Ceyhan M, Kocoglu E. Influence of  
1031 circadian rhythm on the efficacy of the hepatitis B vaccination. Vol. 26, *Vaccine*.  
1032 Netherlands; 2008. p. 1143–4.
- 1033 55. Katoonizadeh A, Sharafkhan M, Ostovaneh MR, Norouzi A, Khoshbakht N,  
1034 Mohamadkhani A, et al. Immune responses to hepatitis B immunization 10-18 years  
1035 after primary vaccination: a population-based cohort study. *Journal of Viral Hepatitis*.  
1036 2016;23:805–11.
- 1037 56. Sharp CP, Gregory WF, Hattingh L, Malik A, Adland E, Daniels S, et al. PARV4  
1038 prevalence, phylogeny, immunology and coinfection with HIV, HBV and HCV in a  
1039 multicentre African cohort. *Wellcome Open Research*. 2017;2(0):26.
- 1040 57. Hadler SC, Francis DP, Maynard JE, Thompson SE, Judson FN, Echenberg dean F,  
1041 et al. Long-term Immunogenicity and Efficacy of Hepatitis B Vaccine in Homosexual  
1042 Men. *New England Journal of Medicine*. 1986;315(4):209–14.
- 1043 58. World Health Organization. *Hepatitis B factsheet*.  
1044 2017;<http://www.who.int/mediacentre/factsheets/fs204/en>.
- 1045 59. Gentile I, Borgia G. Vertical transmission of hepatitis B virus: Challenges and  
1046 solutions. *International Journal of Women’s Health*. 2014;6(1):605–11.
- 1047 60. Borgia G, Carleo MA, Gaeta GB, Gentile I. Hepatitis B in pregnancy. *World Journal of*  
1048 *Gastroenterology*. 2012;18(34):4677–83.
- 1049 61. Fattovich G, Bortolotti F, Donato F. Natural history of chronic hepatitis B: Special  
1050 emphasis on disease progression and prognostic factors. *Journal of Hepatology*.  
1051 2008;48(2):335–52.
- 1052 62. Liang TJ. *Hepatitis B: The virus and Disease*. *Hepatology*.



- 1053 2009;49:doi:10.1002/hep.22881.
- 1054 63. Faria NR, Da Costa AC, Lourenço J, Loureiro P, Lopes ME, Ribeiro R, et al. Genomic  
1055 and epidemiological characterisation of a dengue virus outbreak among blood donors  
1056 in Brazil. *Scientific Reports*. 2017;7(1):1–12.
- 1057 64. Lourenço J, de Lima MM, Faria NR, Walker A, Kraemer MUG, Villabona-Arenas CJ,  
1058 et al. Epidemiological and ecological determinants of Zika virus transmission in an  
1059 urban setting. *eLife*. 2017;(February 2015).
- 1060 65. Statistics South Africa. Census 2011 - Census in brief. 2012.
- 1061 66. Schilsky ML. Hepatitis B “360.” *Transplantation Proceedings*. 2013;45(3):982–5.
- 1062 67. Degli Esposti S, Shah D. Hepatitis B and pregnancy: Challenges and Treatment.  
1063 *Gastroenterology Clinics of North America*. 2011;40:355–72.
- 1064 68. Piratvisuth T. Optimal management of HBV infection during pregnancy. *Liver  
1065 International*. 2013;33(SUPPL. 1):188–94.
- 1066 69. Chu C-J, Hussain M, Lok ASF. Quantitative serum HBV DNA levels during different  
1067 stages of chronic hepatitis B infection. *Hepatology (Baltimore, Md)*. 2002;36(6):1408–  
1068 15.
- 1069 70. Tong S, Kim KH, Chante C, Wands J, Li J. Hepatitis B Virus e Antigen Variants. *Int J  
1070 Med Sci*. 2005;2(1):2–7.
- 1071 71. Scaglioni PP, Melegari M, Wands JR. Biologic properties of hepatitis B viral genomes  
1072 with mutations in the precore promoter and precore open reading frame. *Virology*.  
1073 1997;233(2):374–81.
- 1074 72. Hasegawa K, Huang J, Rogers S a, Blum HE, Liang TJ. Enhanced replication of a  
1075 hepatitis B virus mutant associated with an epidemic of fulminant hepatitis. *Journal of  
1076 virology*. 1994;68(3):1651–9.
- 1077 73. Lampoudi S, Gillespie DT, Petzold LR. The multinomial simulation algorithm for  
1078 discrete stochastic simulation of reaction-diffusion systems. *Journal of Chemical  
1079 Physics*. 2009;130(9):1–16.
- 1080 74. Lourenço J, Recker M. The 2012 Madeira Dengue Outbreak: Epidemiological  
1081 Determinants and Future Epidemic Potential. *PLoS Neglected Tropical Diseases*.  
1082 2014;8(8).
- 1083 75. Mena G, García-Basteiro AL, Bayas JM. Hepatitis B and A vaccination in HIV-infected  
1084 adults: A review. *Human vaccines & immunotherapeutics*. 2015;11(11):2582–98.
- 1085 76. Li W, Urban S. Entry of hepatitis B and hepatitis D virus into hepatocytes: Basic  
1086 insights and clinical implications. *Journal of Hepatology*. 2016;64(1):S32–40.
- 1087
- 1088

1089 **FIGURE LEGENDS**

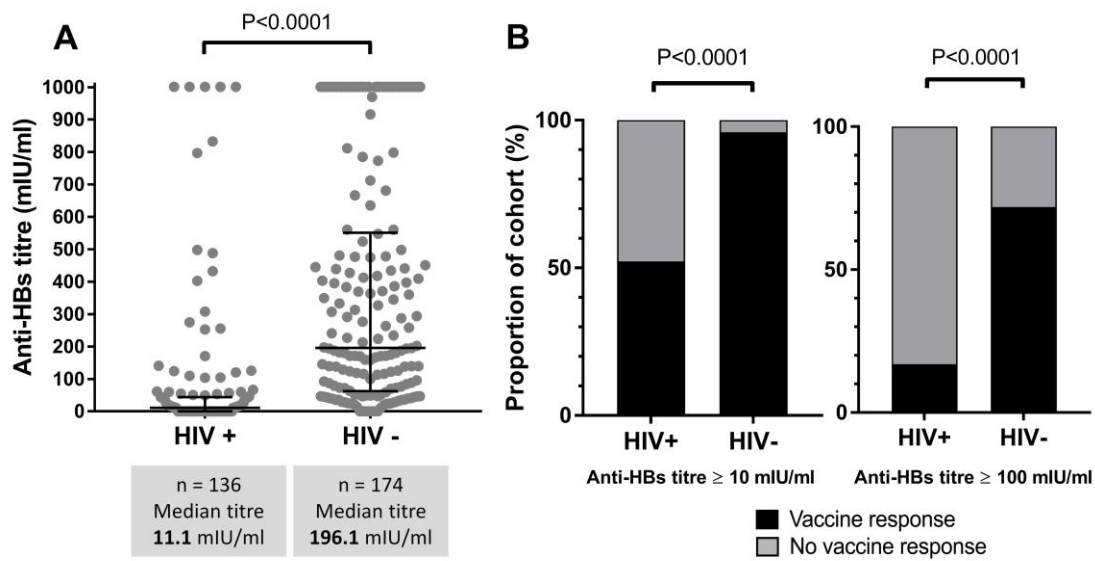

1090

1091 **Figure 1: Hepatitis B surface antibody (anti-HBs) titres mediated by vaccination in HIV-**

1092 **positive (HIV+) and HIV-negative (HIV-) children aged 6-60 months in Kimberley, South**

1093 **Africa.** A: Scatter plot representing vaccine-mediated antibody titres, indicating median and

1094 interquartile ranges (p-value by Mann Whitney U test). B: Proportion of children with anti-HBs

1095 ≥10 mIU/ml or ≥100 mIU/ml (p-values by Fisher's Exact Test).

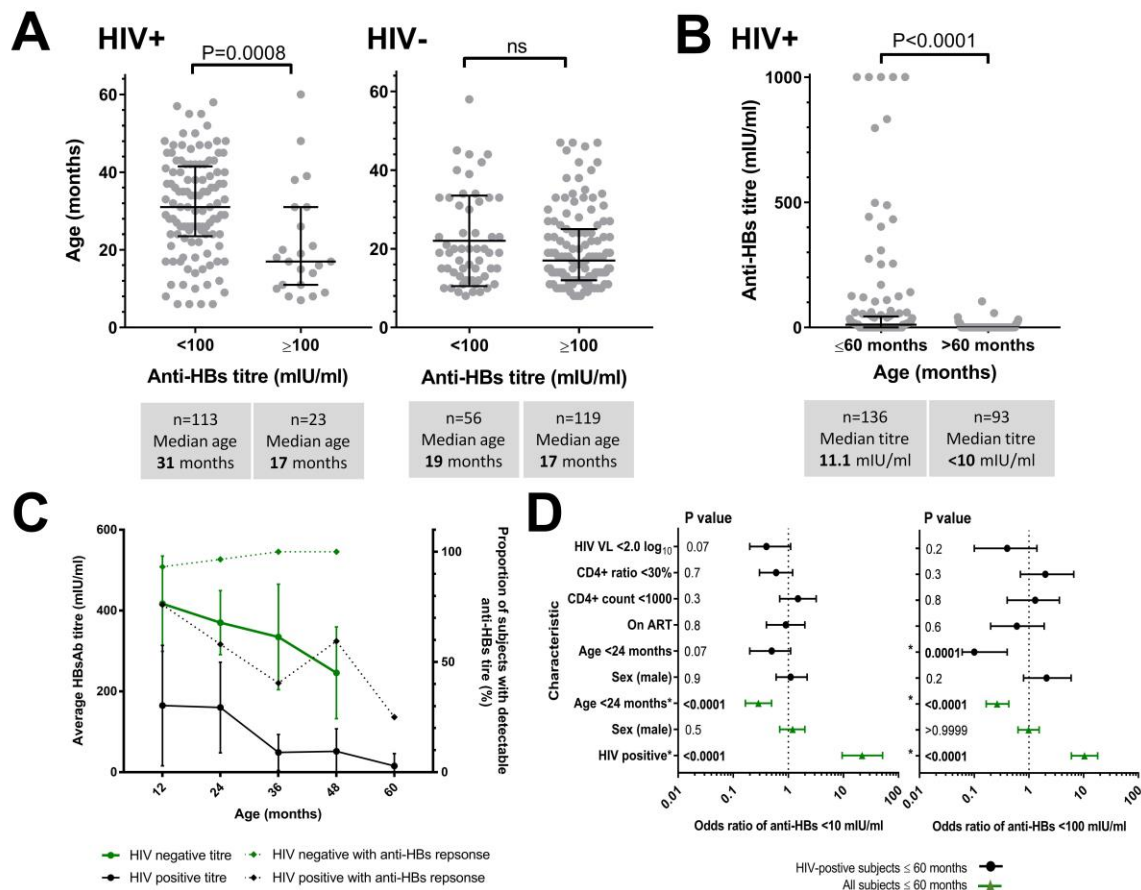

1096

1097

**Figure 2: Relationship between age and vaccine-mediated Hepatitis B surface antibody (anti-HBs) titres in HIV-positive and HIV-negative children in Kimberley, South Africa.**

1098

1099

A: Ages of children attaining anti-HBs titres  $\geq 100$  mIU/ml for HIV-positive and HIV-negative

1100

children age 6-60 months. Median ages, interquartile ranges and p-values by Mann-Whitney

1101

U test are indicated. B: Relationship between age and vaccine-mediated Ab titre among HIV-

1102

positive children including those age 6-60 months and an older cohort age  $>60$  months (range

1103

64-193 months). P-value by Mann Whitney U test. C: Anti-HBs titre and proportion of subjects

1104

with a detectable titre for HIV-positive and HIV-negative children according to age. On the

1105

solid lines, each point represents the mean titre (with 95% confidence intervals) for the group

1106

of children aged  $\leq 12$  months (1 yr), 13-24 months (2 yrs), 25-36 months (3 yrs), 37-48 months

1107

(4 yrs), 49-60 months (5 years). For the same groups of children, the dotted lines represent

1108

the proportion of subjects with a detectable titre and the 95% confidence intervals. Trends

1109

within the data were assessed using linear regression analysis D: Odds ratios for protective

1110

response to HBV vaccination in children age 6-60 months in Kimberley, South Africa are

1111

shown for anti-HBs titre  $<10$  mIU/ml and  $<100$  mIU/ml in the whole cohort (green) and in HIV-

1112

positive children (black). Statistically significant OR are denoted \* and significant p-values are

1113

indicated in bold. Figure 2: Relationship between age and vaccine-mediated Hepatitis B

1114 surface antibody (anti-HBs) titres in HIV-positive and HIV-negative children in Kimberley,  
 1115 South Africa.

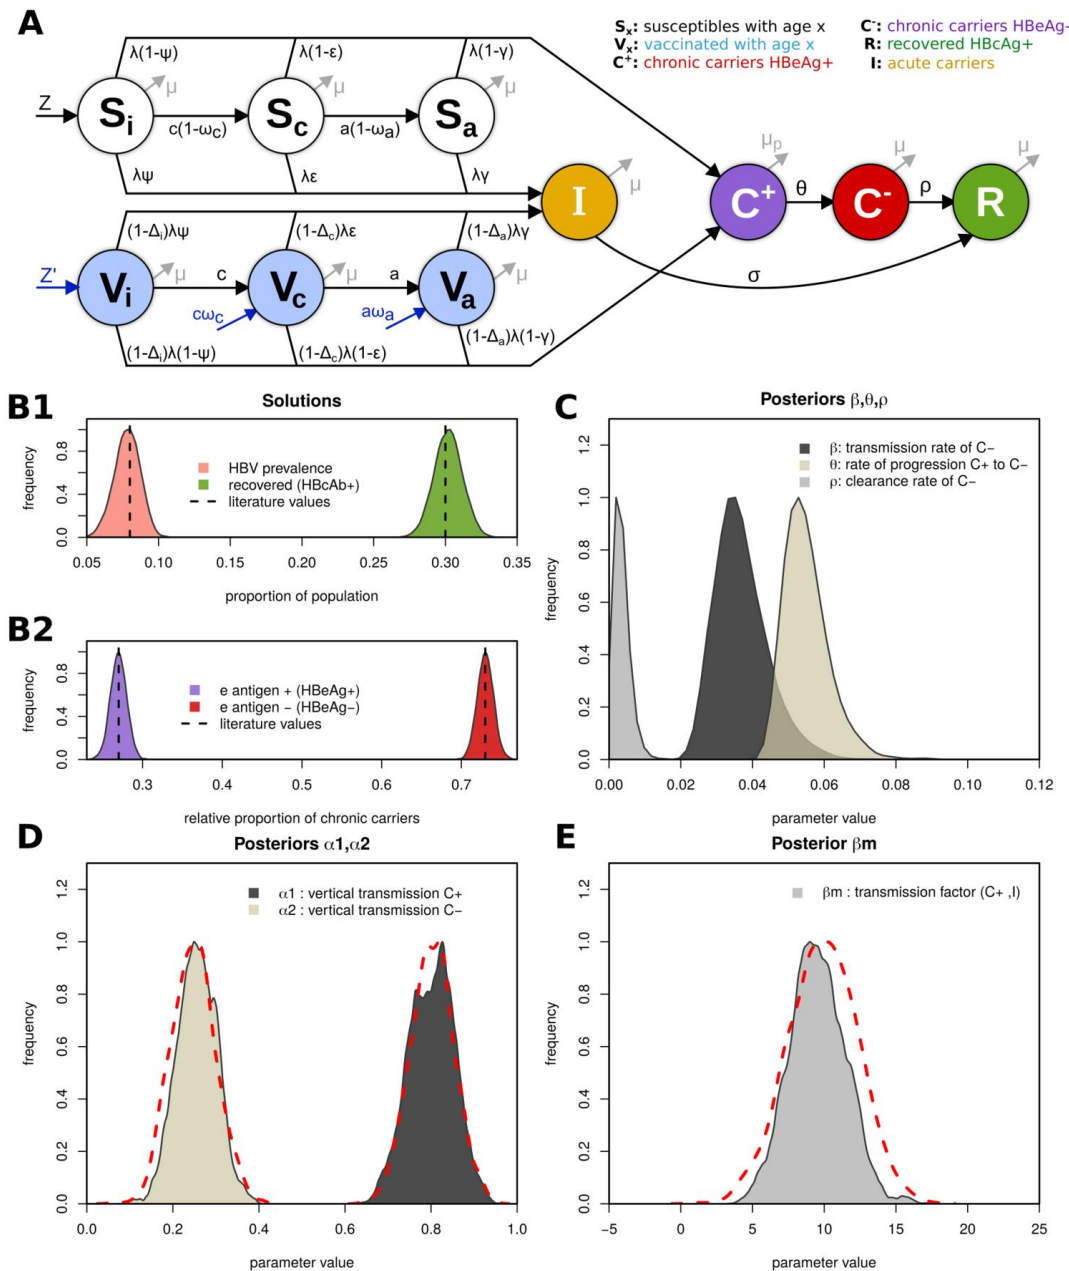

1116

1117 **Figure 3: Diagram showing model of HBV dynamics in a population, fitted solutions and**

1118 **parameter posteriors. (A)** Diagram of the ODE model. Susceptibles ( $S_x$ ) and vaccinated ( $V_x$ )

1119 are divided into 3 classes representing infants ( $x=i$ , <1 years of age), children ( $x=c$ , 1-6 years

1120 of age) and older individuals ( $x=a$ , >6 years of age). Further details in the Methods section.

1121 **(B1-B2)** Distributions of pre-intervention ODE model output at equilibrium for the fitted classes:

1122 (B1) carriers ( $I+C^++C^-$ , HBsAg+, salmon) and recovered ( $R$ , HBeAg+, green); (B2) relative

1123 proportions of HBeAg+ ( $C^+$ , purple) and HBeAg- ( $C^-$ , red) among chronic carriers ( $C^++C^-$ ).

1124 Distributions of target variables (fitted, B1, B2) are obtained by running the deterministic model

1125 with 10,000 samples of the posteriors shown in subplots C-E. Dashed vertical lines present

1126 the target fitted proportions based on the SA cohort and literature reports (see Methods  
 1127 Section). **(C-E)** Posterior distributions for the fitted parameters (1.5 million samples), with  
 1128 informative priors drawn with dashed red lines (1000 samples from distributions). Support  
 1129 results for the cohort data-driven approach related to HIV status and HBV vaccine-induced  
 1130 protection are in **Figure 3 - Supplement Figure 1**.  
 1131

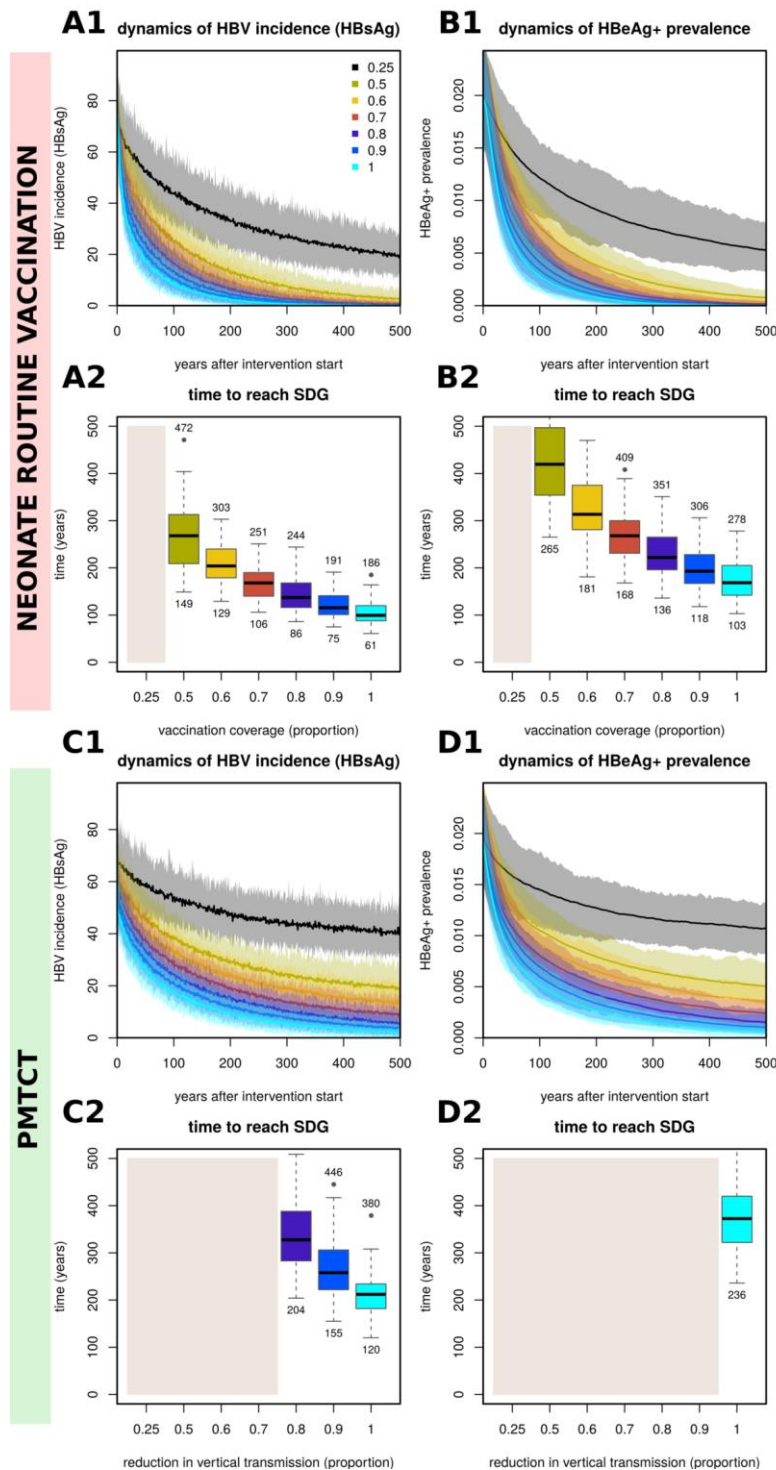

**Figure 4: Stochastic impact of neonatal vaccination and PMTCT on HBV incidence (HBsAg) and HBeAg+ prevalence, showing time to reach sustainable development goals when using interventions independently. (A1-A2) Impact on HBV incidence (HBsAg) (A1) and time to reach sustainable development goal (SDG) (A2) for varying routine immunization coverage of neonates. (B1-B2) Impact on HBeAg+ prevalence (B1) and time to reach SDG (B2) for varying routine immunization coverage of neonates. (C1-C2) Impact on HBV incidence (HBsAg) (C1) and time to reach SDG (C2) for varying PMTCT coverage. (D1-D2) Impact on HBeAg+ prevalence (D1) and time to reach SDG (D2) for varying PMTCT coverage. (A1, B1, C1, D1) Lines are the mean and shaded areas the standard deviation of model output when running 50 stochastic simulations per intervention (sampling the parameter posteriors shown in Figure 1). (A2, B2, C2, D2) HBV incidence**

1161 standard deviation of model output when running 50 stochastic simulations per intervention  
 1162 (sampling the parameter posteriors shown in Figure 1). **(A2, B2, C2, D2) HBV incidence**

1163 **(HBsAg)** SDG is set to a reduction of 90%. HBeAg+ prevalence SDG is set to 1/1000  
 1164 individuals. Beige areas mark interventions reaching SDGs after 500 years on average.  
 1165 Boxplots show the variation of the 50 stochastic simulations. Numbers above and below  
 1166 boxplots show the 2.5% lower and 97.5% upper limits of the solutions. **(All subplots)**  
 1167 Intervention coverage varies from 0.25 to 1 (as coloured and named in subplot A1). Support  
 1168 results: deterministic solutions of neonatal vaccination and PMTCT are in Figure 4 – **Figure**  
 1169 **supplement 1**; for stochastic solutions of neonatal vaccination and PMTCT with impact on  
 1170 total prevalence (acute and chronic) are in **Figure 4 – Figure supplement 2**.

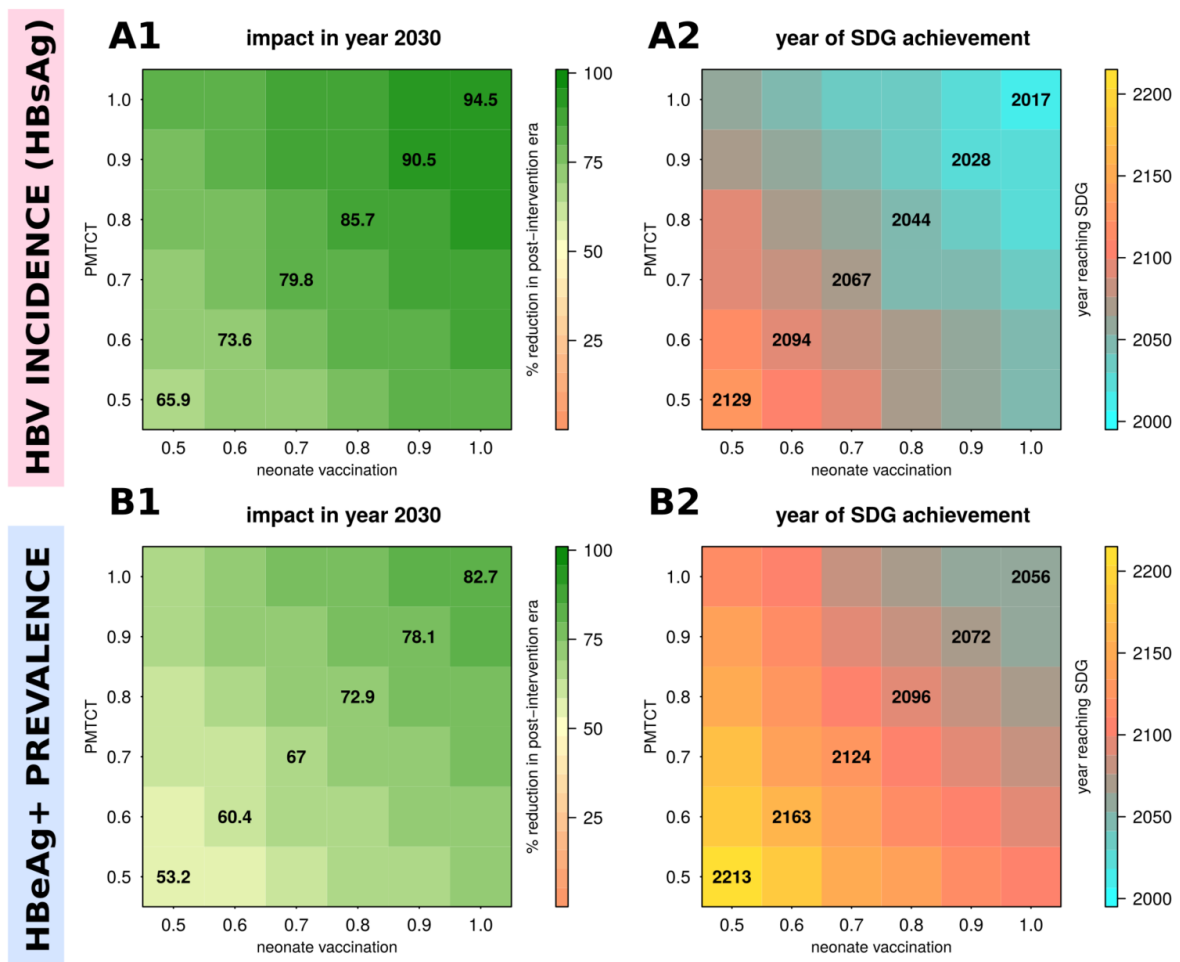

1171  
 1172 **Figure 5: Sensitivity of mean intervention impact on HBV incidence (HBsAg) and**  
 1173 **HBeAg+ prevalence based on combinations of routine neonatal vaccination and**  
 1174 **PMTCT. (A1-A2) Mean impact of interventions on HBV incidence (HBsAg) (A1) and mean**  
 1175 **time to reach sustainable development goals (SDGs) (A2). (B1-B2) Mean impact of**  
 1176 **interventions on HBeAg+ prevalence (B2) and mean time to reach SDG (B2). (All subplots)**  
 1177 **Impact is shown as percent reduction in incidence or prevalence compared to pre-intervention**  
 1178 **levels (e.g. 50 indicates a 50% reduction compared to before the start of the intervention).**  
 1179 **HBV incidence (HBsAg) SDG is set to a reduction of 90%. HBeAg+ prevalence SDG is set**

1180 to 1/1000 individuals. Mean results are obtained from 50 stochastic simulations per  
 1181 intervention combination (vaccination, PMTCT) with parameters sampled from the posteriors  
 1182 shown in Figure 1. Start of interventions in the stochastic simulations is in year 1995 to  
 1183 simulate an appropriate time scale to address impact by 2030. Support results: impact and  
 1184 time to reach SDGs when considering combinations of PMTCT and routine vaccination of  
 1185 individuals at the age of 6 are in **Figure 5 – Figure supplement 1**; impact and time to reach  
 1186 SDGs when considering combinations of PMTCT and neonate routine vaccination plus a  
 1187 complete catch-up campaign are in **Figure 5 – Figure supplement 2**.

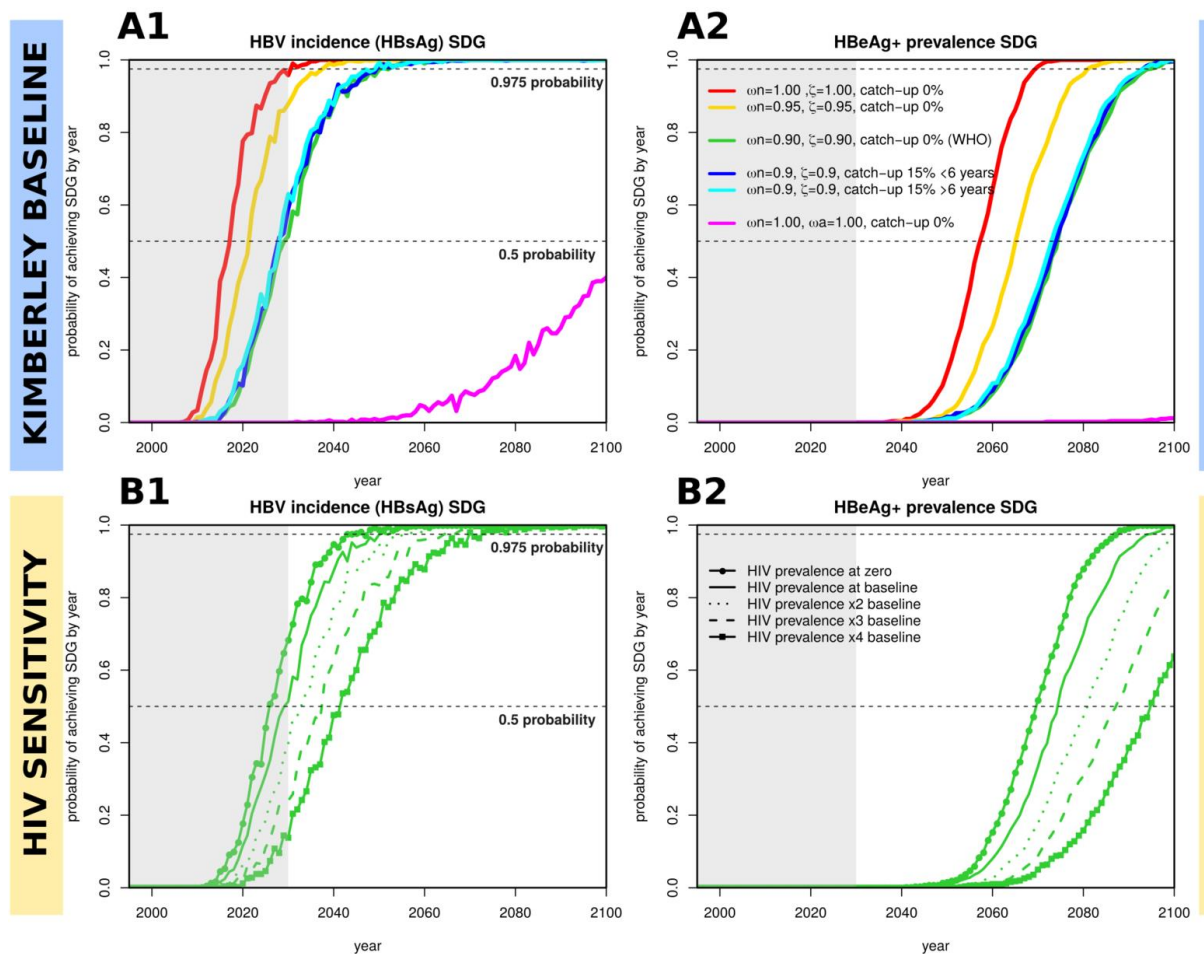

1188  
 1189 **Figure 6: Yearly estimated probabilities of achieving sustainable development goals for**  
 1190 **HBV incidence (HBsAg) and HBeAg+ prevalence based on particular combinations of**  
 1191 **interventions and local HIV prevalence levels.** A total of 1000 stochastic simulations are  
 1192 run independently for each set of particular interventions (coloured legend, subplot A2), with  
 1193 each using a random parameter sample from the posteriors shown in Figure 1. Interventions  
 1194 start in year 1995. For every year post-intervention start, the proportion of simulations that  
 1195 have achieved the sustainable development goals (SDGs) is recorded and taken to be the  
 1196 probability. **(A1)** Probability of reaching **HBV incidence (HBsAg) SDG** in time (goal is set to  
 1197 a reduction of 90%). **(A2)** Probability of reaching **HBeAg+ prevalence SDG** in time (goal is set

1198 to 1/1000 individuals). **(B1, B2)** Same as subplots A1-A2 but addressing sensitivity to HIV  
 1199 prevalence levels in the population for a particular intervention (green,  $\omega n=0.9$ ,  $\zeta=0.9$ , catch-  
 1200 up 0% (WHO)). Solid line is the same as in subplots A1-A2 (named HIV prevalence at  
 1201 baseline). Other lines present results assuming zero HIV prevalence (full line with points) or  
 1202 higher prevalences (dotted, dashed, line with squares). **(All subplots)** The dashed horizontal  
 1203 lines mark 0.5 and 0.975 probability of achieving SDGs. The grey shaded area marks the time  
 1204 period before 2030. In the interventions,  $\omega n$  is routine vaccination of neonates,  $\zeta$  the PMTCT  
 1205 effort,  $\omega a$  routine vaccination of +6 years of age, and catch-up a one-off event of vaccination  
 1206 in some age groups or general population.  
 1207

## 1208 SUPPORTING FIGURES

1209

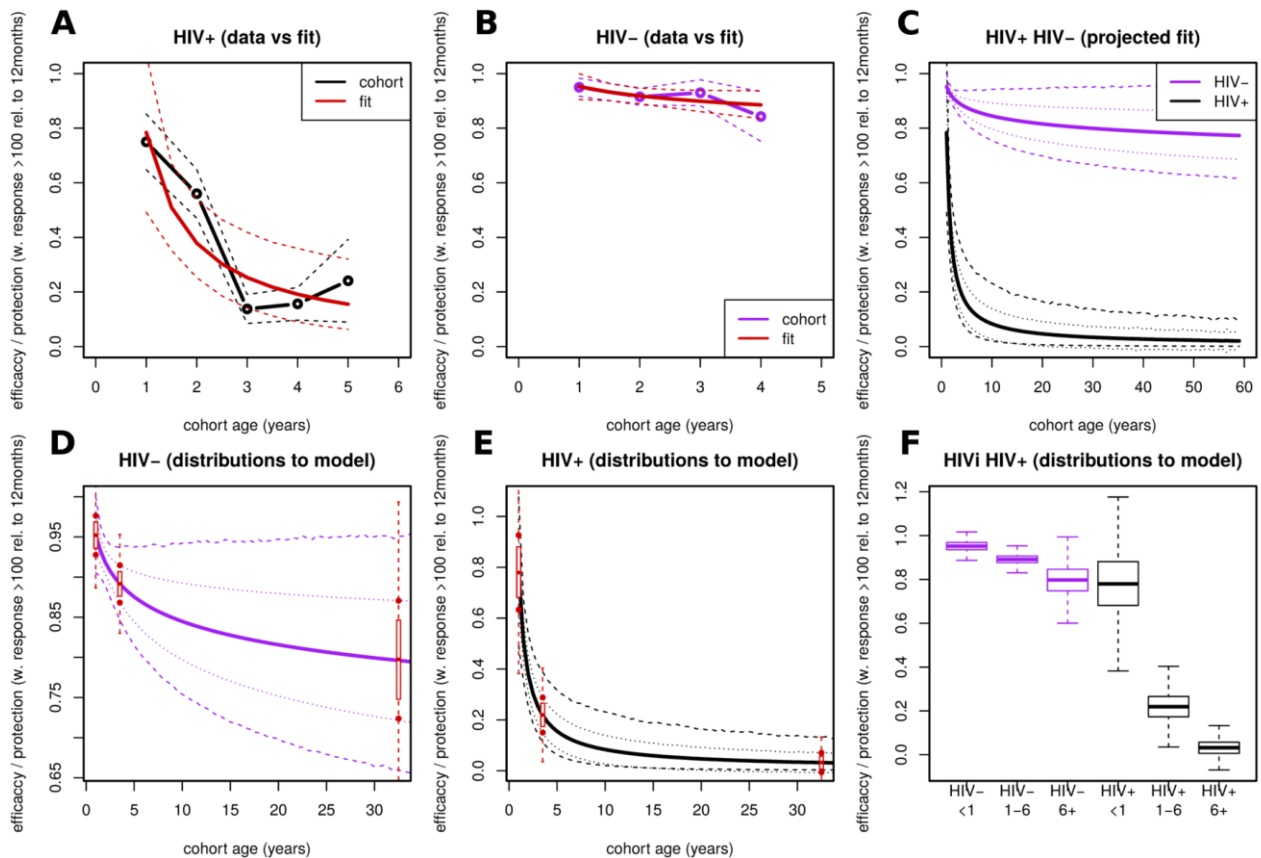

1210

1211 **Figure 3 – Figure supplement 1: Fitting HBV vaccine response according to HIV serostatus.** **(A, B)** Data on HBV  
 1212 vaccine response (see sections *Waning of vaccine response with age*, and *Odds of developing an anti-HBs*  
 1213 *response*) dependent on HIV serostatus. Data (points) and standard error (dashed) are shown in black for HIV+  
 1214 (A) and purple for HIV- (B). Fit and 95% CI is shown in red. **(C)** Predicted HBV vaccine response dependent on  
 1215 HIV serostatus (HIV+ black, HIV- purple) across all ages. Dashed lines are the fitted 95% CI; dotted lines are the  
 1216 fitted standard deviation; solid bold lines are the fitted mean. **(D, E)** Boxplots in red show distributions  
 1217 obtained with 10,000 samples from a gaussian distribution with mean and standard deviation equal to the  
 1218 point prediction at mean ages of each age class in the dynamic model (0.5 years for class <1 years old, 3.5



1219 years for class 1-6 years old, 32.5 years for age class 6+ years old). Distributions in subplot D are for HIV-  
1220 individuals and in subplot E are for HIV+ individuals. Red dots show the gaussian sampled standard deviation  
1221 (which is seen approximating the fitted standard deviation). **(F)** Summary of the distributions found in subplots  
1222 D and E according to HIV serostatus and later used in the dynamic model (HIV- in purple with <1y mean=0.952  
1223 std=0.024, 1-6y mean=0.892 std=0.023, 6+y mean=0.796 std=0.074; HIV+ in black with <1y mean=0.784  
1224 std=0.148, 1-6y mean=0.217 std=0.070, 6+y mean=0.031 std=0.039). **(A-C)** For fit details refer to methods  
1225 section.

1226

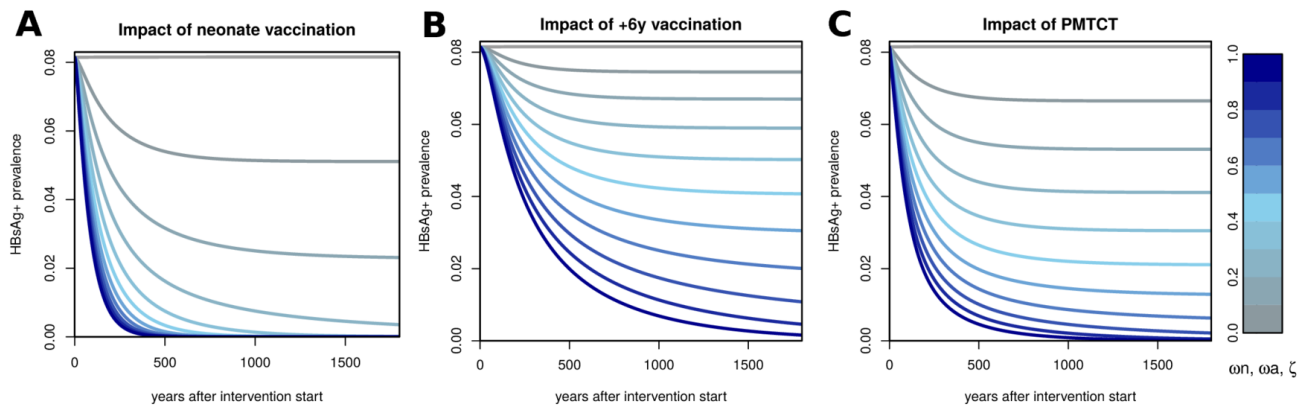

1227

1228 **Figure 4 – Figure supplement 1: Sensitivity of interventions with deterministic output.** Impact of **(A)** neonate  
1229 vaccination ( $\omega_n$ ), **(B)** vaccination at 6 years of age ( $\omega_a$ ), and **(C)** PMTCT ( $\zeta$ ), on HBV prevalence (HBsAg) in  
1230 time. The coverage / effort of simulated interventions quantified on the color scale to the right from 0 (no  
1231 coverage / effort) to 1 (full coverage / effort). Impact is quantified by post-intervention reductions in HBV  
1232 prevalence (HBsAg). Impact is highest for neonate vaccination, followed by PMTCT and lastly vaccination at 6  
1233 years of age for the same intervention effort. Simulations use the median parameter values of the posteriors  
1234 shown in Figure 1. Results with stochastic simulations are presented in Figures 4-6 of the main text (and  
1235 corresponding Support Figures).

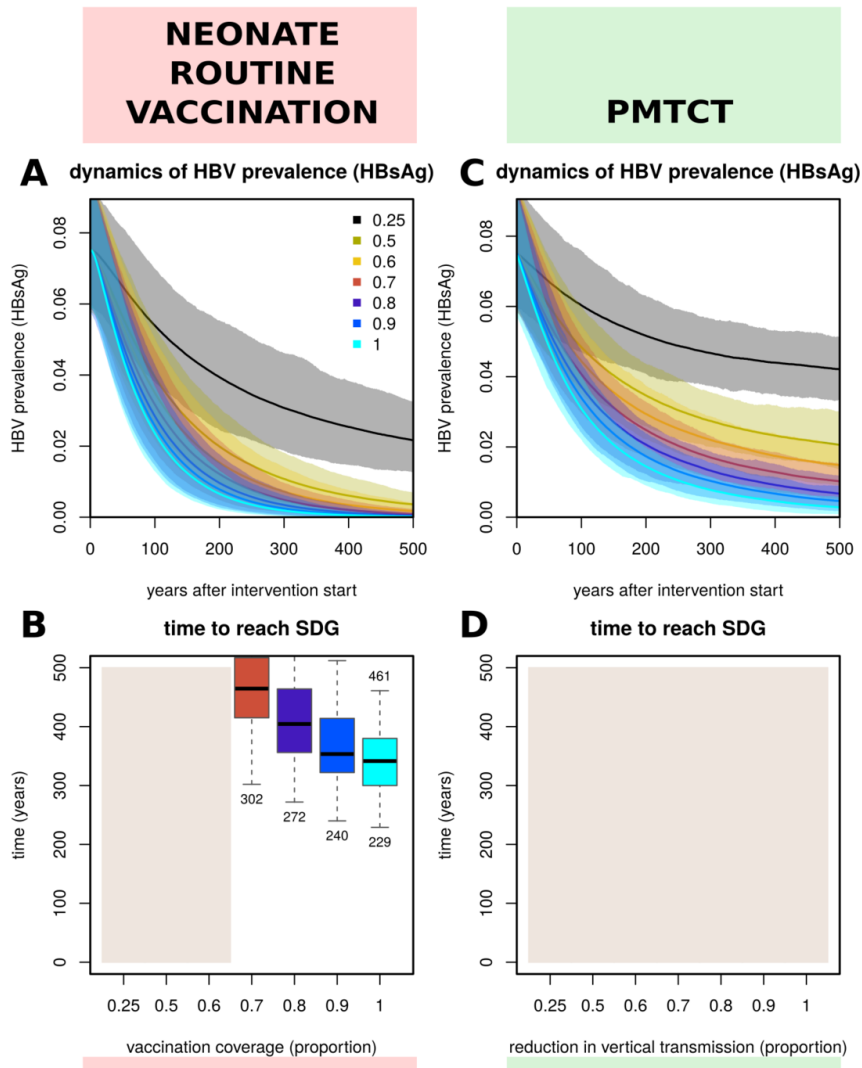

1236

1237 **Figure 4 – Figure supplement 2: Post-intervention stochastic impact on HBV prevalence (HBsAg), with time**  
 1238 **to reach sustainable development goals when using routine neonatal vaccination and PMTCT**  
 1239 **independently. (A, B) Impact (reduction) on HBV prevalence (HBsAg) (A) and time to reach sustainable**  
 1240 **development goal (SDG) goal (B) for varying coverage of neonates. (C, D) Impact (reduction) on HBV**  
 1241 **prevalence (HBsAg) (C) and time to reach SDG (D) for varying PMTCT. (All subplots) Intervention coverage /**  
 1242 **effort varies from 0.25 to 1 (as colored and named in subplot A). (A, C) Lines are the mean and shaded areas**  
 1243 **are the standard deviation of model output when running 50 stochastic simulations per intervention (sampling**  
 1244 **the posteriors shown in Figure 1). (B, D) Beige areas mark interventions reaching SDGs after 500 years on**  
 1245 **average. Boxplots show the variation of the 50 stochastic simulations. Numbers above and below boxplots**  
 1246 **show the 2.5% lower and 97.5% upper limits of the solutions. The SDG is 1 in a 1000 individuals. Compared to**  
 1247 **Figure 4 in the main text: measuring impact with SDG on HBV incidence (HBsAg) (as opposed to HBV**  
 1248 **prevalence) results in more optimistic projections, i.e. shorter times to SDG (compare Figure 4 A2, C2 with this**  
 1249 **figure subplots B, D). PMTCT is unable to present solutions reaching the SDG for HBV prevalence (HBsAg) in 500**  
 1250 **years (D).**

1251

1252

1253

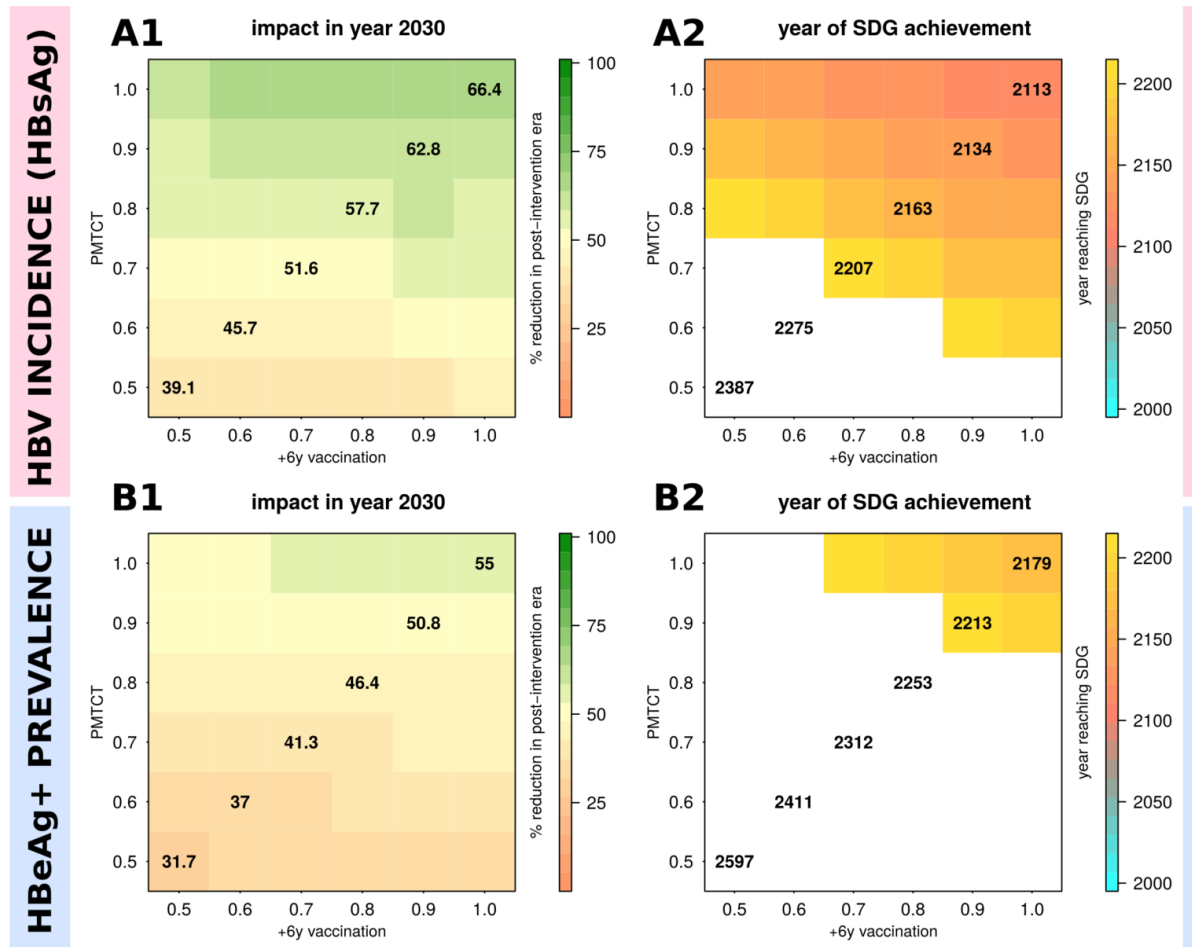

1254

1255 **Figure 5 – Figure supplement 1: Sensitivity of mean intervention impact on HBV incidence (HBsAg) and**  
 1256 **HBeAg+ prevalence, with estimated mean year to reach sustainable development goals for combinations of**  
 1257 **routine +6 years vaccination and PMTCT. (A1-A2) Mean impact of interventions on HBV incidence (HBsAg)**  
 1258 **(A1) and mean time to reach sustainable development goals (SDGs) (A2). (B1-B2) Mean impact of**  
 1259 **interventions on HBeAg+ prevalence (B2) and mean time to reach SDG (B2). (All subplots) Impact is shown as**  
 1260 **percent reduction in incidence or prevalence compared to pre-intervention levels (e.g. 50 indicates a 50%**  
 1261 **reduction compared to last time step before intervention start). HBV incidence (HBsAg) SDG is set to a**  
 1262 **reduction of 90%. HBeAg+ prevalence SDG is set to 1 in a 1000 individuals. Mean results are obtained from 50**  
 1263 **stochastic simulations per intervention combination (vaccination, PMTCT) with parameters sampled from the**  
 1264 **posteriors shown in Figure 1. Start of interventions in the stochastic simulations is in year 1995 to simulate an**  
 1265 **appropriate time scale to address impact by 2030. Compared to Figure 5 main text: the combination of PMTCT**  
 1266 **and routine vaccination of +6 years is highly suboptimal, with perfect routine coverage and PMTCT (top right**  
 1267 **cell, subplots A1, B1) achieving reductions of HBV incidence (HBsAg) and HBeAg+ prevalence by 2030 similar**  
 1268 **to half the vaccination coverage for neonates and half the PMTCT effort seen in Figure 5 (top right cell,**  
 1269 **subplots A1, B1), for example.**

1270

1271

1272

1273

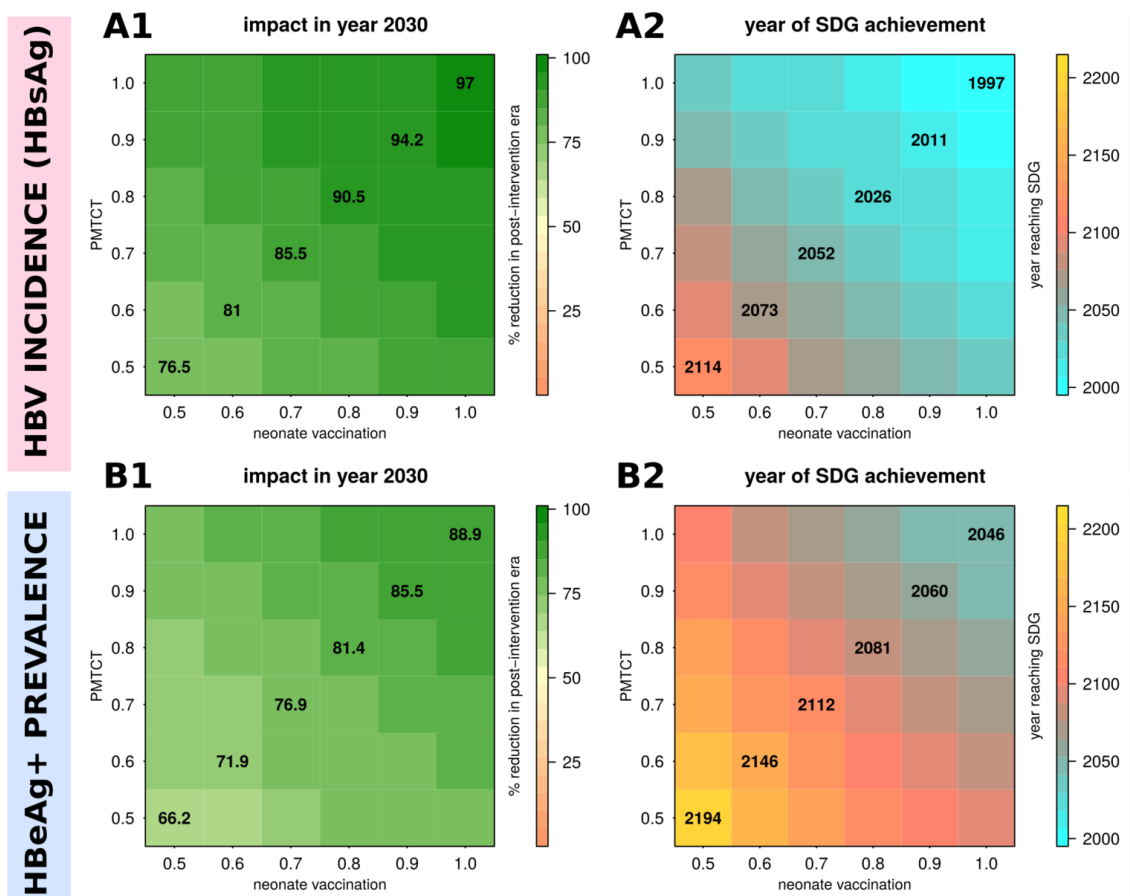

1274

1275 **Figure 5 – Figure supplement 2: Sensitivity of mean intervention impact on HBV incidence (HBsAg) and**  
 1276 **HBeAg+ prevalence, with estimated mean year to reach sustainable development goals for combinations of**  
 1277 **routine neonatal vaccination and PMTCT plus a complete catch-up campaign. (A1-A2) Mean impact of**  
 1278 **interventions on HBV incidence (HBsAg) (A1) and mean time to reach sustainable development goals (SDGs)**  
 1279 **(A2). (B1-B2) Mean impact of interventions on HBeAg+ prevalence (B2) and mean time to reach SDG (B2). (All**  
 1280 **subplots) Impact is shown as percent reduction in incidence or prevalence compared to pre-intervention levels**  
 1281 **(e.g. 50 indicates a 50% reduction compared to last time step before intervention start). HBV incidence**  
 1282 **(HBsAg) SDG is set to a reduction of 90%. HBeAg+ prevalence SDG is set to 1 in a 1000 individuals. Mean**  
 1283 **results are obtained from 50 stochastic simulations per intervention combination (vaccination, PMTCT) with**  
 1284 **parameters sampled from the posteriors shown in Figure 1. Start of interventions in the stochastic simulations**  
 1285 **is in year 1995 to simulate an appropriate time scale to address impact by 2030. Complete catch-up campaign**  
 1286 **stands for a one-off event with 100% coverage of all susceptible individuals in the population at the start of**  
 1287 **interventions. Compared to Figure 5 main text: adding one 100% catch-up campaign to the interventions in**  
 1288 **Figure 5 is beneficial, for which the highest reductions of HBV incidence (HBsAg) and HBeAg+ prevalence by**  
 1289 **2030 are achieved, as well as the shorter times to SDG. However, 100% catch-up is logistically and**  
 1290 **economically not feasible and the added benefits are small. For example, with complete neonatal coverage**  
 1291 **and PMTCT (top right cell, subplots A1, B1), the catch-up campaign would only add <5% in the mean reduction**  
 1292 **of HBV incidence (HBsAg) and HBeAg+ prevalence up to year 2030 (compare to top-right cells of subplots A1**  
 1293 **and B1 in Figure 5).**

1294

1295 **SUPPLEMENTARY DATA**

1296

1297 **Suppl data 1.** Metadata for three paediatric cohorts recruited in Kimberley, South Africa,  
1298 including longitudinal CD4+ T cell and viral load data for paediatric HIV cohort age  $\leq 60$  months  
1299 in Kimberley, South Africa. This file is available on-line via the following link:  
1300 <https://figshare.com/s/cd1e4f324606949d1680>

1301

1302 **FIGURE SUPPLEMENTS**

1303

1304 Figure 3 – Figure supplement 1: Fitting HBV vaccine response according to HIV serostatus.

1305

1306 Figure 4 – Figure supplement 1: Sensitivity of interventions with deterministic output.

1307

1308 Figure 4 – Figure supplement 2: Post-intervention stochastic impact on HBV prevalence  
1309 (HBsAg), with time to reach sustainable development goals when using routine neonatal  
1310 vaccination and PMTCT independently.

1311

1312 Figure 5 – Figure supplement 1: Sensitivity of mean intervention impact on HBV incidence  
1313 (HBsAg) and HBeAg+ prevalence, with estimated mean year to reach sustainable  
1314 development goals for combinations of routine +6 years vaccination and PMTCT.

1315

1316 Figure 5 – Figure supplement 2: Sensitivity of mean intervention impact on HBV incidence  
1317 (HBsAg) and HBeAg+ prevalence, with estimated mean year to reach sustainable  
1318 development goals for combinations of routine neonatal vaccination and PMTCT plus a  
1319 complete catch-up campaign.

1320

1321

1322

1323

1324

1325

1326 **ACKNOWLEDGEMENTS**

1327 Nil

1328

1329 **CONFLICTS OF INTEREST**

1330 None to declare

1331

1332 **FUNDING**

1333 PCM, PK and PJRG are funded by the Wellcome Trust (grant numbers 110110/Z/15/Z to PM,  
1334 109965MA to PK, and 104748MA to PJRG); <https://wellcome.ac.uk>. Recruitment and  
1335 serological testing of the KReC cohort was covered by a project grant awarded to PCM from  
1336 the Rosetrees Trust <http://www.rosetreestrust.co.uk>. SG and JL received funding from the  
1337 European Research Council under the European Union's Seventh Framework Programme  
1338 (FP7/2007-2013)/ERC grant agreement no. 268904-DIVERSITY <https://erc.europa.eu>. PK is  
1339 also funded by an NIHR Senior Fellowship <https://www.nihr.ac.uk>. The funders had no role in  
1340 study design, data collection and analysis, decision to publish, or preparation of the  
1341 manuscript.

1342
